# Supplementary material for: FOXQ1 recruits the MLL complex to activate transcription of EMT and promote breast cancer metastasis
Source: PubMed Central journal article supplement (PMC9626503; doi:10.1038/s41467-022-34239-z), 2022-11-01
Supplement: 41467_2022_34239_MOESM1_ESM.pdf [file 41467_2022_34239_MOESM1_ESM.pdf]

## Supplementary Information for:

### **FOXQ1 Recruits the MLL Complex to Activate Transcription of EMT and Promote Breast Cancer Metastasis**

Allison V. Mitchell, Ling Wu, C. James Block, Mu Zhang, Justin Hackett, Douglas B. Craig, Wei Chen, Yongzhong Zhao, Bin Zhang, Yongjun Dang, Xiaohong Zhang, Shengping Zhang, Chuangui Wang, Heather Gibson, Lori A. Pile, Benjamin Kidder, Larry Matherly, Zhe Yang, Yali Dou, Guojun Wu#

**#Corresponding Author:** Guojun Wu, Ph.D. [wugu@karmanos.org](mailto:wugu@karmanos.org)

#### **The PDF include:**

#### **Supplementary Figures:**

Supplementary Figure 1. Binding of the MLL core complex is biochemically and functionally specific to FOXQ1.

Supplementary Figure 2. FOXQ1 and RbBP5 co-localize within EMT promoters.

Supplementary Figure 3. RbBP5 binding within EMT promoters is dependent upon FOXQ1.

Supplementary Figure 4. Extended validation of the FOXQ1 Forkhead box binding to RbBP5.

Supplementary Figure 5. Disruption of RbBP5 recruitment prevents activation of the FOXQ1 EMT program.

Supplementary Figure 6. Targeting the MLL core complex decreases the FOXQ1-driven oncogenic phenotype *in vitro*.

Supplementary Figure 7. Expression of FOXQ1 RbBP5-defective mutants results in a decrease in FOXQ1-driven oncogenic potential *in vitro*.

Supplementary Figure 8. Disruption of the FOXQ1-RbBP5 interaction results in an inhibition of tumor progression *in vivo*.

#### **Supplementary Tables:**

Supplementary Table 1. Sequence of gene-specific shRNAs.

Supplementary Table 2. PCR primers, Cloning primers and mutagenesis primers

Supplementary Table 3. Antibodies

# Supplementary Figure 1

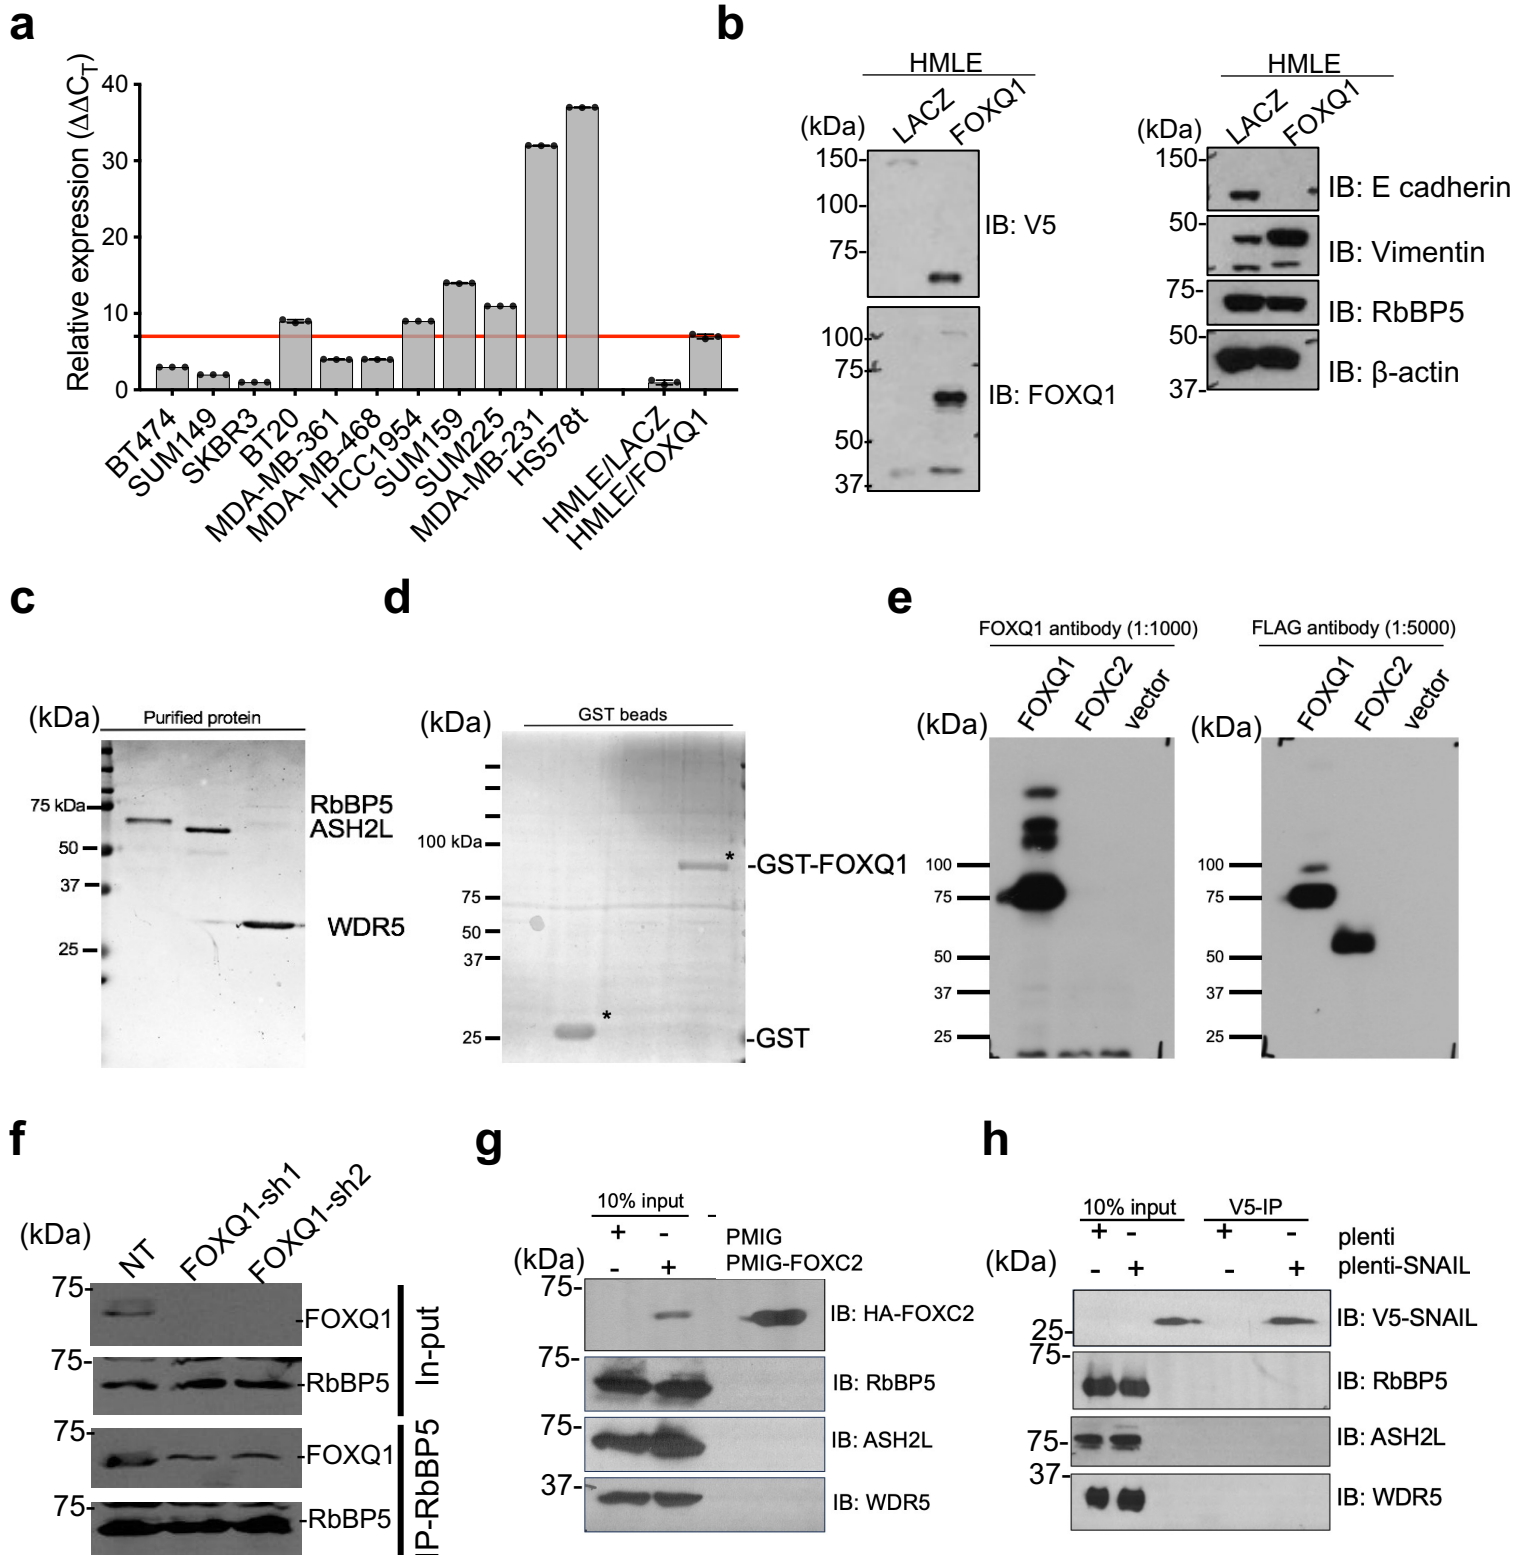

**Supplementary Figure 1. Binding of the MLL core complex is biochemically and functionally specific to FOXQ1.** **(a)** Quantification of FOXQ1 mRNA expression in a panel of breast cancer model cell lines by qRT-PCR. Values were normalized to  $\beta$ -actin relative to HMLE/LacZ control cells. Bar marks mean  $\pm$  SD. Data points mark values for independent replicates (n=3). The red line marks the relative FOXQ1 expression in the HMLE/FOXQ1 cells, which shows that the FOXQ1 ectopic expression is comparable to the endogenous FOXQ1 expression observed in TNBC cell lines. Source data are provided in Source Data file 1. **(b)** Human mammary luminal epithelial cells (HMLE) with stable lentiviral expression of V5-tagged FOXQ1 or LacZ vector control were analyzed by western blot and probed with indicated antibodies to determine relative protein expression. **(c)** Image of SDS-PAGE results of recombinant, untagged MLL core complex proteins (RbBP5, ASH2L, WDR5) expressed in *E. coli* and purified for use as prey for GST pull down. **(d)** Recombinant GST-FOXQ1, or GST control resin was examined by SDS-PAGE and subsequently incubated at equimolar ratio with MLL core complex proteins for GST pull down experiments. **(e)** Validation of FOXQ1 antibody. HEK293 cells were transfected with FLAG-FOXQ1, FLAG-FOXC2 or vector control. Membrane was probed with anti-FOXQ1 antibody from Rabbit serum. FLAG probed membrane serves as negative control. **(f)** MDA-MB231 cells with nontarget (NT) control and FOXQ1 knockdown. 10% in-put (two top panels) and protein lysates precipitated with RbBP5 antibody (two bottom panels) were probed with FOXQ1 antibody. **(g)** Co-IP in HEK293T cells with transient overexpression of HA-tagged FOXC2, or empty vector control (PMIG-HA). HA-IPs were probed with antibodies against endogenous MLL core complex proteins (RbBP5, ASH2L, WDR5). **(h)** Co-IP in HEK293T cells with transient overexpression of plenti-SNAIL1-V5. V5-IPs were probed with antibodies against endogenous MLL core complex proteins (RbBP5, ASH2L, WDR5). For panels 1b-h, representative images are shown (n=3).

# Supplementary Figure 2

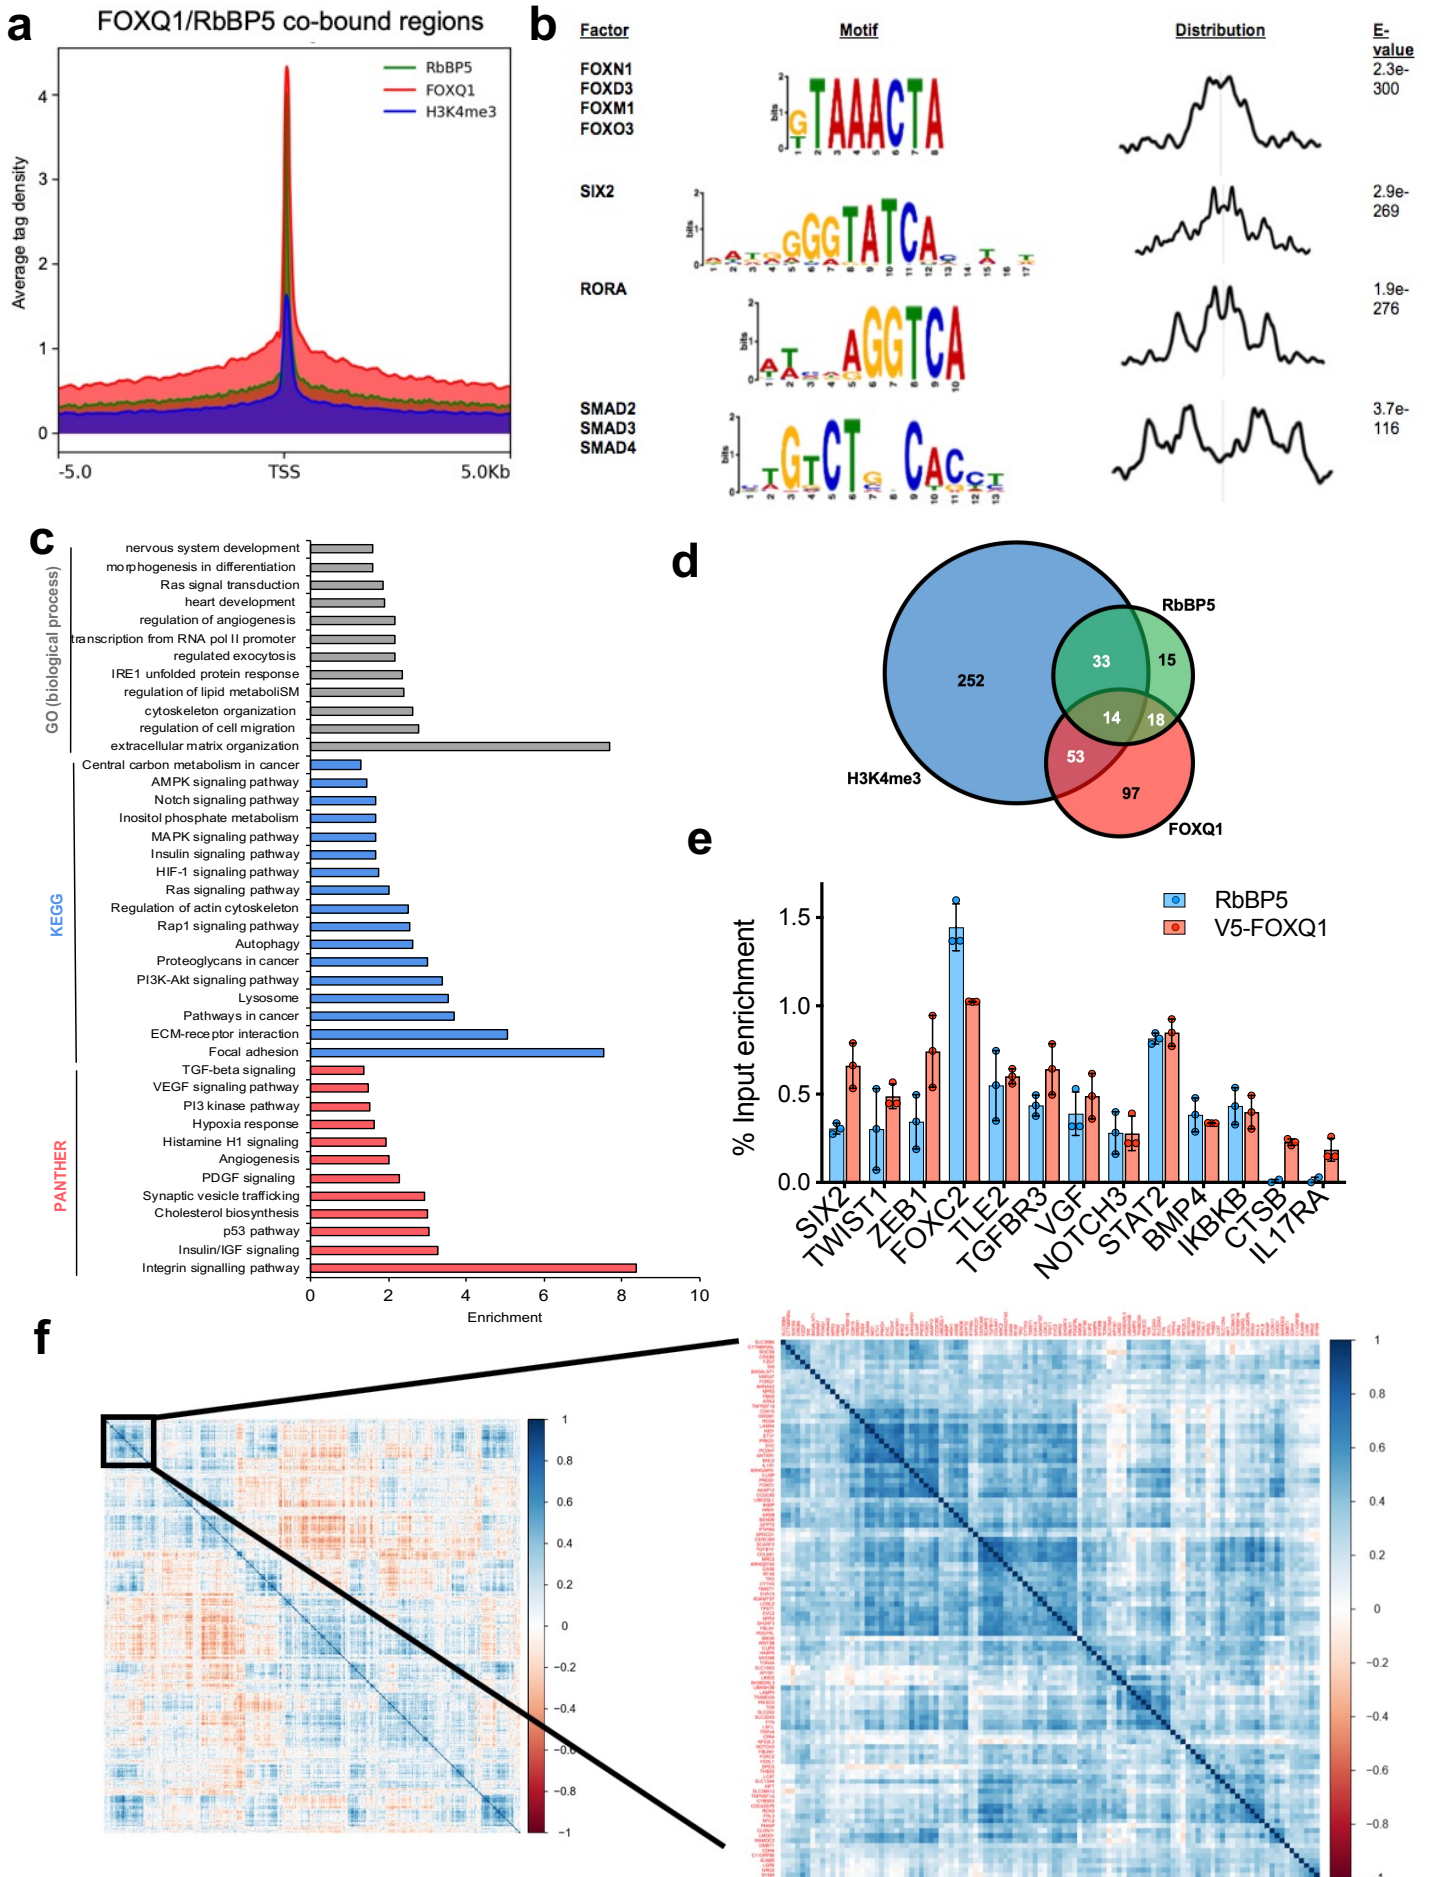

**g**

| KEGG               | P-value   | Adjusted p-value |
|--------------------|-----------|------------------|
| Insulin resistance | 0.0003266 | 0.04376          |
| Focal adhesion     | 0.0008423 | 0.05643          |

| ARCHS4 Kinase Coexpression | P-value   | Adjusted p-value |
|----------------------------|-----------|------------------|
| PDGFRB                     | 7.726e-23 | 2.627e-20        |
| DDR2                       | 1.625e-21 | 2.763e-19        |
| MYLK                       | 3.233e-20 | 3.664e-18        |

**h**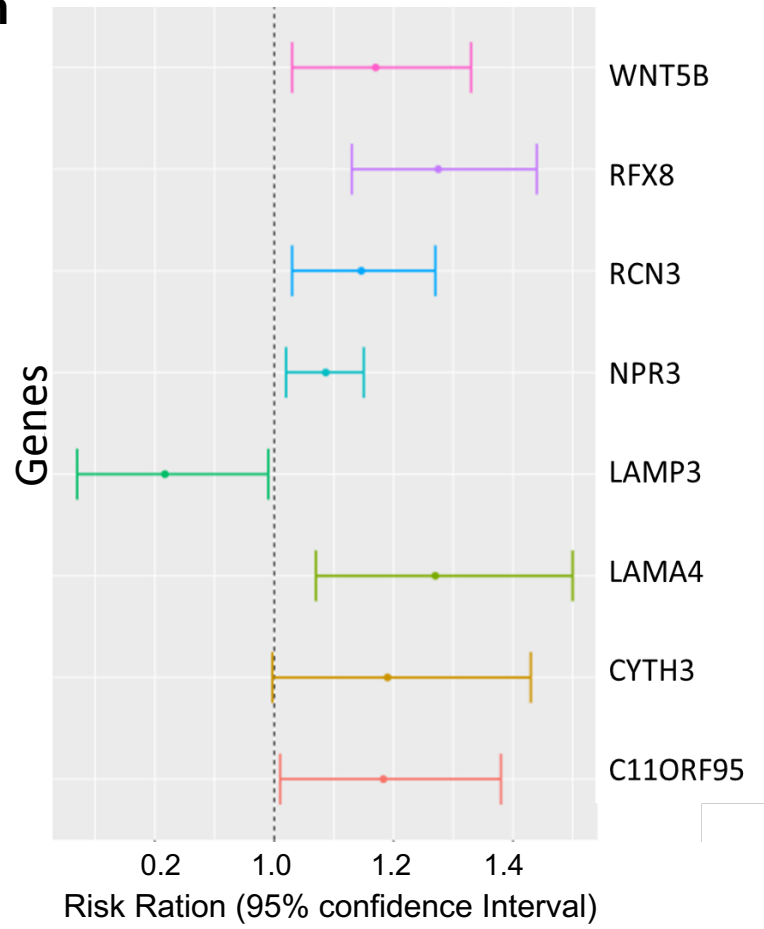

**Supplementary Figure 2. FOXQ1 and RbBP5 co-localize within EMT promoters.**

**(a)** FOXQ1, RbBP5 and H3K4me3 ChIP-seq signal distribution within FOXQ1-RbBP5 overlapped chromatin regions. Results are plotted centered around TSS  $\pm$  5 kb. **(b)** TF binding motifs identified within the FOXQ1-RbBP5 co-bound regions (MEME). **(c)** Enrichment analysis of the 2,499 differentially upregulated genes identified in HMLE/FOXQ1 cells relative to HMLE/LacZ using Enrichr. Adjusted p-value was derived by comparison to annotated gene sets by two-sided Fisher's exact t-test with Benjamini-Hochberg correction. Graph displays the log-transformed adjusted p-value (Enrichment). **(d)** Venn diagram of the overlap of FOXQ1, RbBP5 and H3K4me3 levels within promoter regions of genes that are differentially downregulated in HMLE/FOXQ1 cells relative to HMLE/LacZ. **(e)** Validation of FOXQ1-RbBP5 co-binding within the promoter region of EMT-associated genes by ChIP-qPCR in HMLE/FOXQ1 cells. IL17RA and CTSB were selected as RbBP5-independent control genes. Percent input enrichment was obtained by comparing the ChIP-enriched signals to the input chromatin sample. Bar marks sample mean  $\pm$  SD. The values for each replicate shown (n=3). Source data are provided in Source Data 1. **(f)** Heatmap depicts the Spearman correlation coefficients for the FOXQ1-RbBP5 signature gene set (622 genes) (left). The top 109 correlated genes (Spearman  $R > 0.2$ , boxed) within the FOXQ1-RbBP5 gene signature were replotted (right). **(g)** Enrichment analysis was performed on the 109 highly correlated FOXQ1/RbBP5-regulated using Enrichr. The gene set was compared to the indicated annotation datasets by two-sided Fisher's exact t-test with Benjamini-Hochberg correction. **(h)** Forest plot of the hazard ratios + 95% confidence interval for FOXQ1/RbBP5 regulated genes associated with overall survival in a multivariate Cox proportional hazards model. Several FOXQ1/RbBP5-regulated genes were associated with worse overall survival. One FOXQ1-RbBP5 associated gene, LAMP3, showed an opposite protective effect.

# Supplementary Figure 3

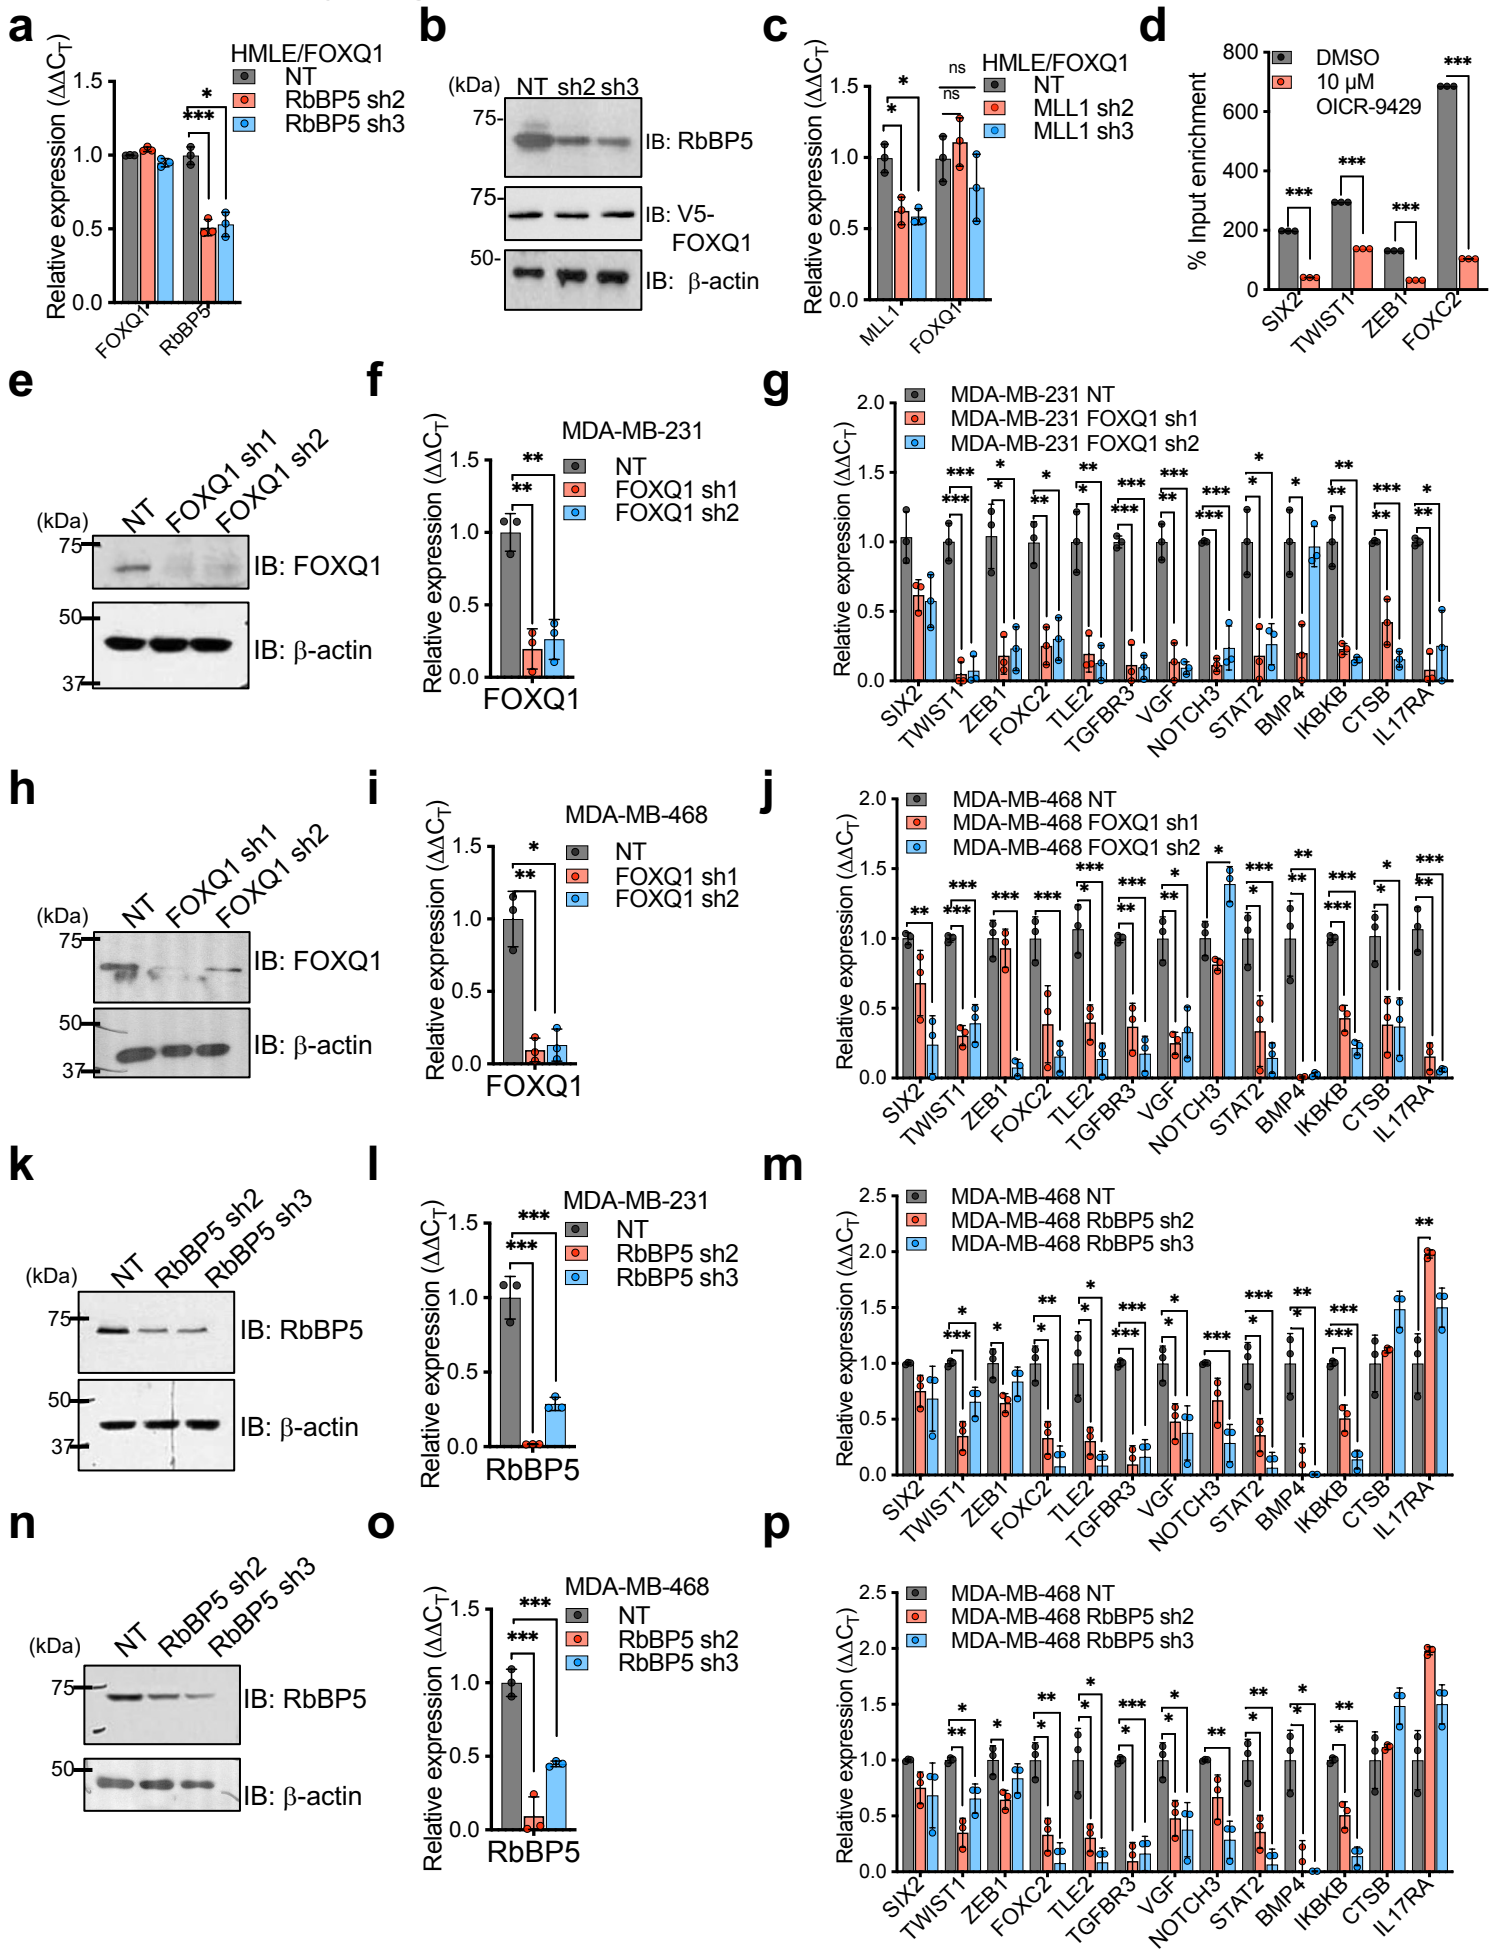

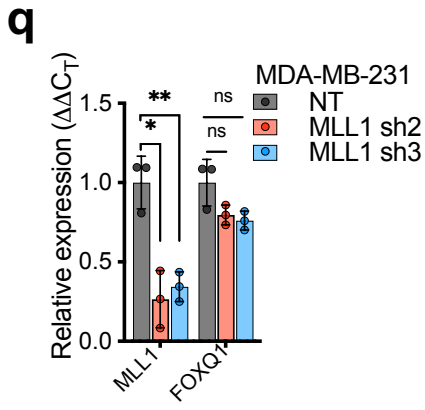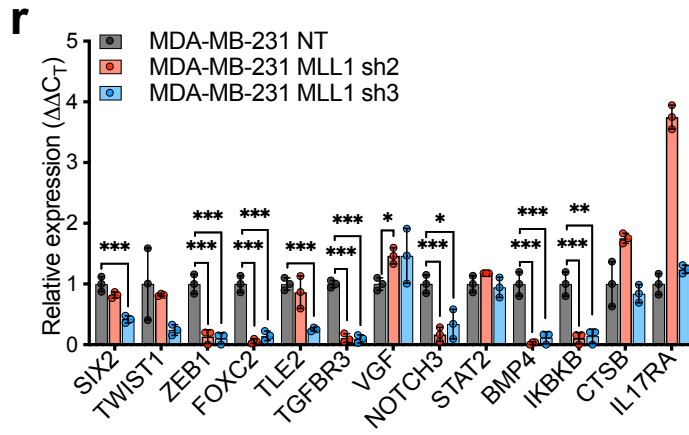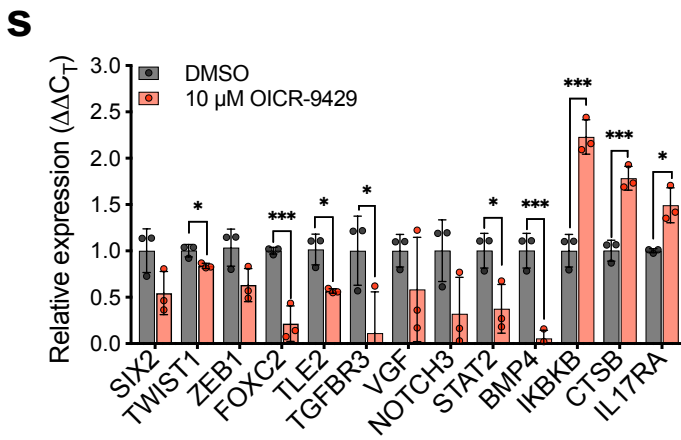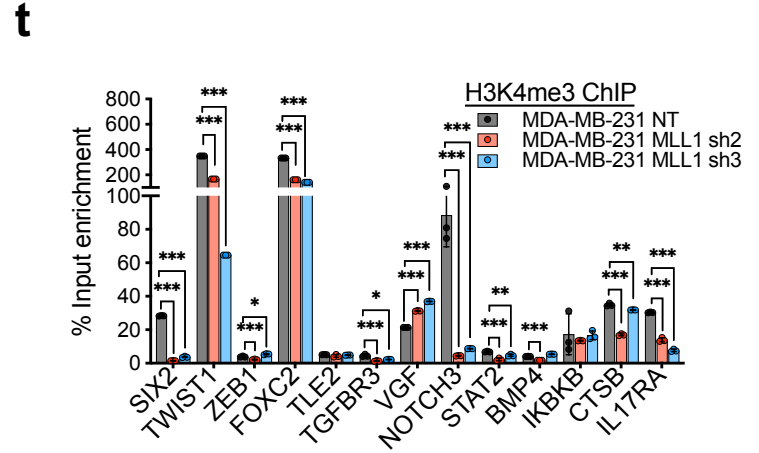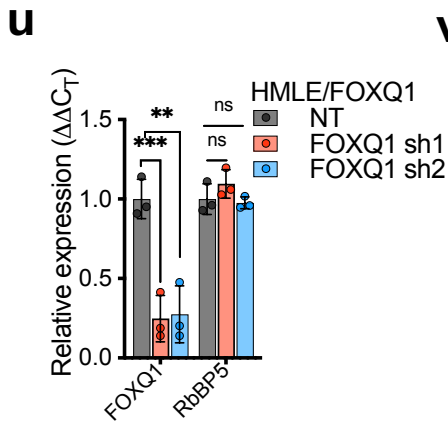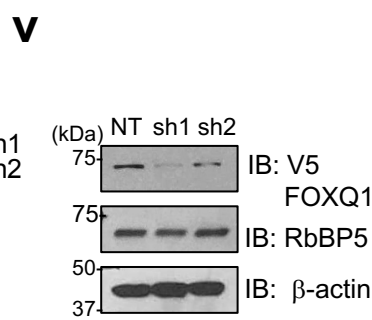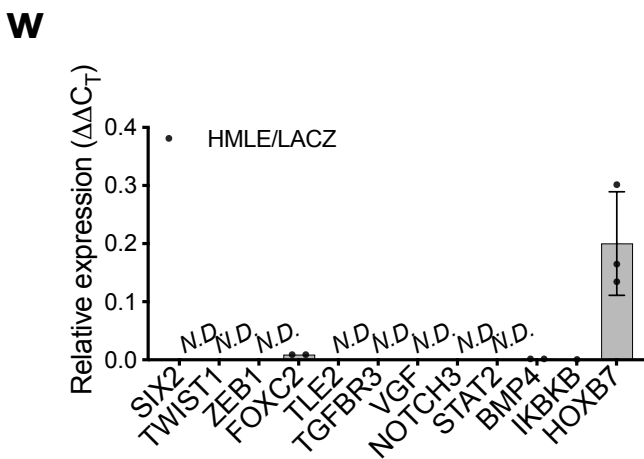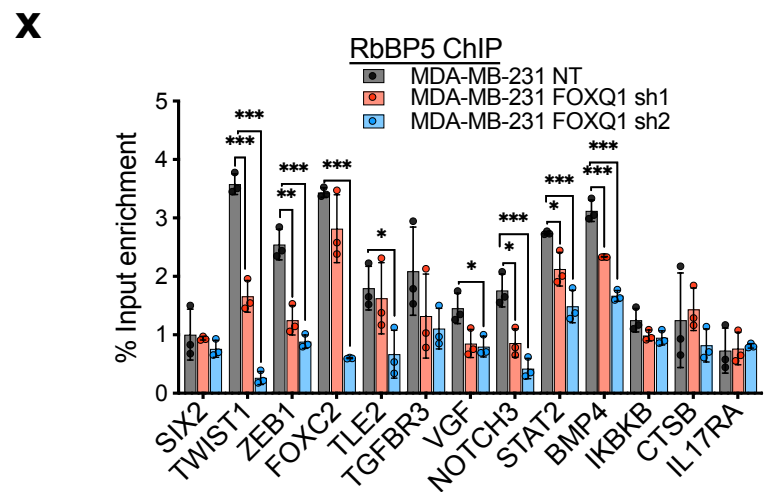



**Supplementary Figure 3. RbBP5 binding within EMT promoters is dependent upon FOXQ1.** (a-b) The efficiency of RbBP5 knockdown in HMLE/FOXQ1 cells was assessed via qRT-PCR (a) and western blot (b). (c) The knockdown efficiency of MLL1 shRNA and the effects on FOXQ1 expression in HMLE/FOXQ1 cells was assessed by qRT-PCR. (d) Pilot study of the effects of OICR-9429 treatment for 72 hours on H3K4me3 within the promoters of EMT transcription factors in HMLE/FOXQ1 cells. H3K4me3 ChIP-qPCR was performed to evaluate H3K4me3 occupancy within the respective EMT gene promoter regions and normalized to chromatin input samples. (e-f) The efficiency of FOXQ1 knockdown in MDA-MB231 cells was assessed via western blot (e) and qRT-PCR (f). (g) Relative expression of the FOXQ1-RbBP5 panel of EMT transcripts in MDA-MB-231 cells with shFOXQ1 or NT control. (h-i) The efficiency of FOXQ1 knockdown in MDA-MB468 cells was assessed via western blot (h) and qRT-PCR (i). (j) Relative expression of the FOXQ1-RbBP5 panel of EMT transcripts in MDA-MB-468 cells with shFOXQ1 or NT control. (k-l) The efficiency of RbBP5 knockdown in MDA-MB231 cells was assessed via western blot (k) and qRT-PCR (l). (m) Relative expression of the FOXQ1-RbBP5 panel of EMT transcripts in MDA-MB231 cells with shRbBP5 or NT control. (n-o) The efficiency of RbBP5 knockdown in MDA-MB468 cells was assessed via western blot (n) and qRT-PCR (o). (p) Relative expression of the FOXQ1-RbBP5 panel of EMT transcripts in MDA-MB-468 cells with shRbBP5 or NT control. (q) The efficiency of MLL1 knockdown in MDA-MB231 cells was assessed via qRT-PCR. FOXQ1 expression is not changed upon MLL1 knockdown. (r-s) Relative expression of the FOXQ1-RbBP5 panel of EMT transcripts in MDA-MB231 cells with shMLL1 or NT control (r) or treated with 10  $\mu$ M OICR9429 for 72 hr (s). (t) ChIP-qPCR of H3K4me3 levels within FOXQ1 target promoters in MDA-MB-231 cells with shMLL1 or NT control. Percent input enrichment was obtained by comparing the ChIP-enriched signals to the signals obtained from the input chromatin sample. (u-v) The efficiency of FOXQ1 knockdown in HMLE/FOXQ1 cells assessed by qRT-PCR (u) and western blot (v). (w) ChIP-qPCR of RbBP5 binding within FOXQ1 target promoters in HMLE/LacZ cell line. N.D. indicates DNA regions that were not detected after 60 quantitative cycles. Percent input enrichment was analyzed same as panel t. (x) ChIP-qPCR of RbBP5 promoter binding in MDA-MB-231 cells with FOXQ1 shRNA or NT control. Percent input enrichment was analyzed same as panel t. For q-RT-PCR experiments (panels b, c, f, g, l, j, l, m, o, p, q, r, s, u), each gene tested was normalized to  $\beta$ -actin in each sample and analyzed relative to the control samples. Replicate values plotted are normalized to control mean. Source data are provided in Source Data file 1. For western blots (panels a, e, k, n, v), representative images are shown (n=3). For all panels, the bar graphs indicate mean  $\pm$  SD. Individual data points mark each of the three independent replicates (n=3). P-value was calculated using unpaired, two-sided t-test with Bonferroni adjustment for multiple comparisons. \* p<0.05, \*\* p<0.01, \*\*\* p<0.001.

# Supplementary Figure 4

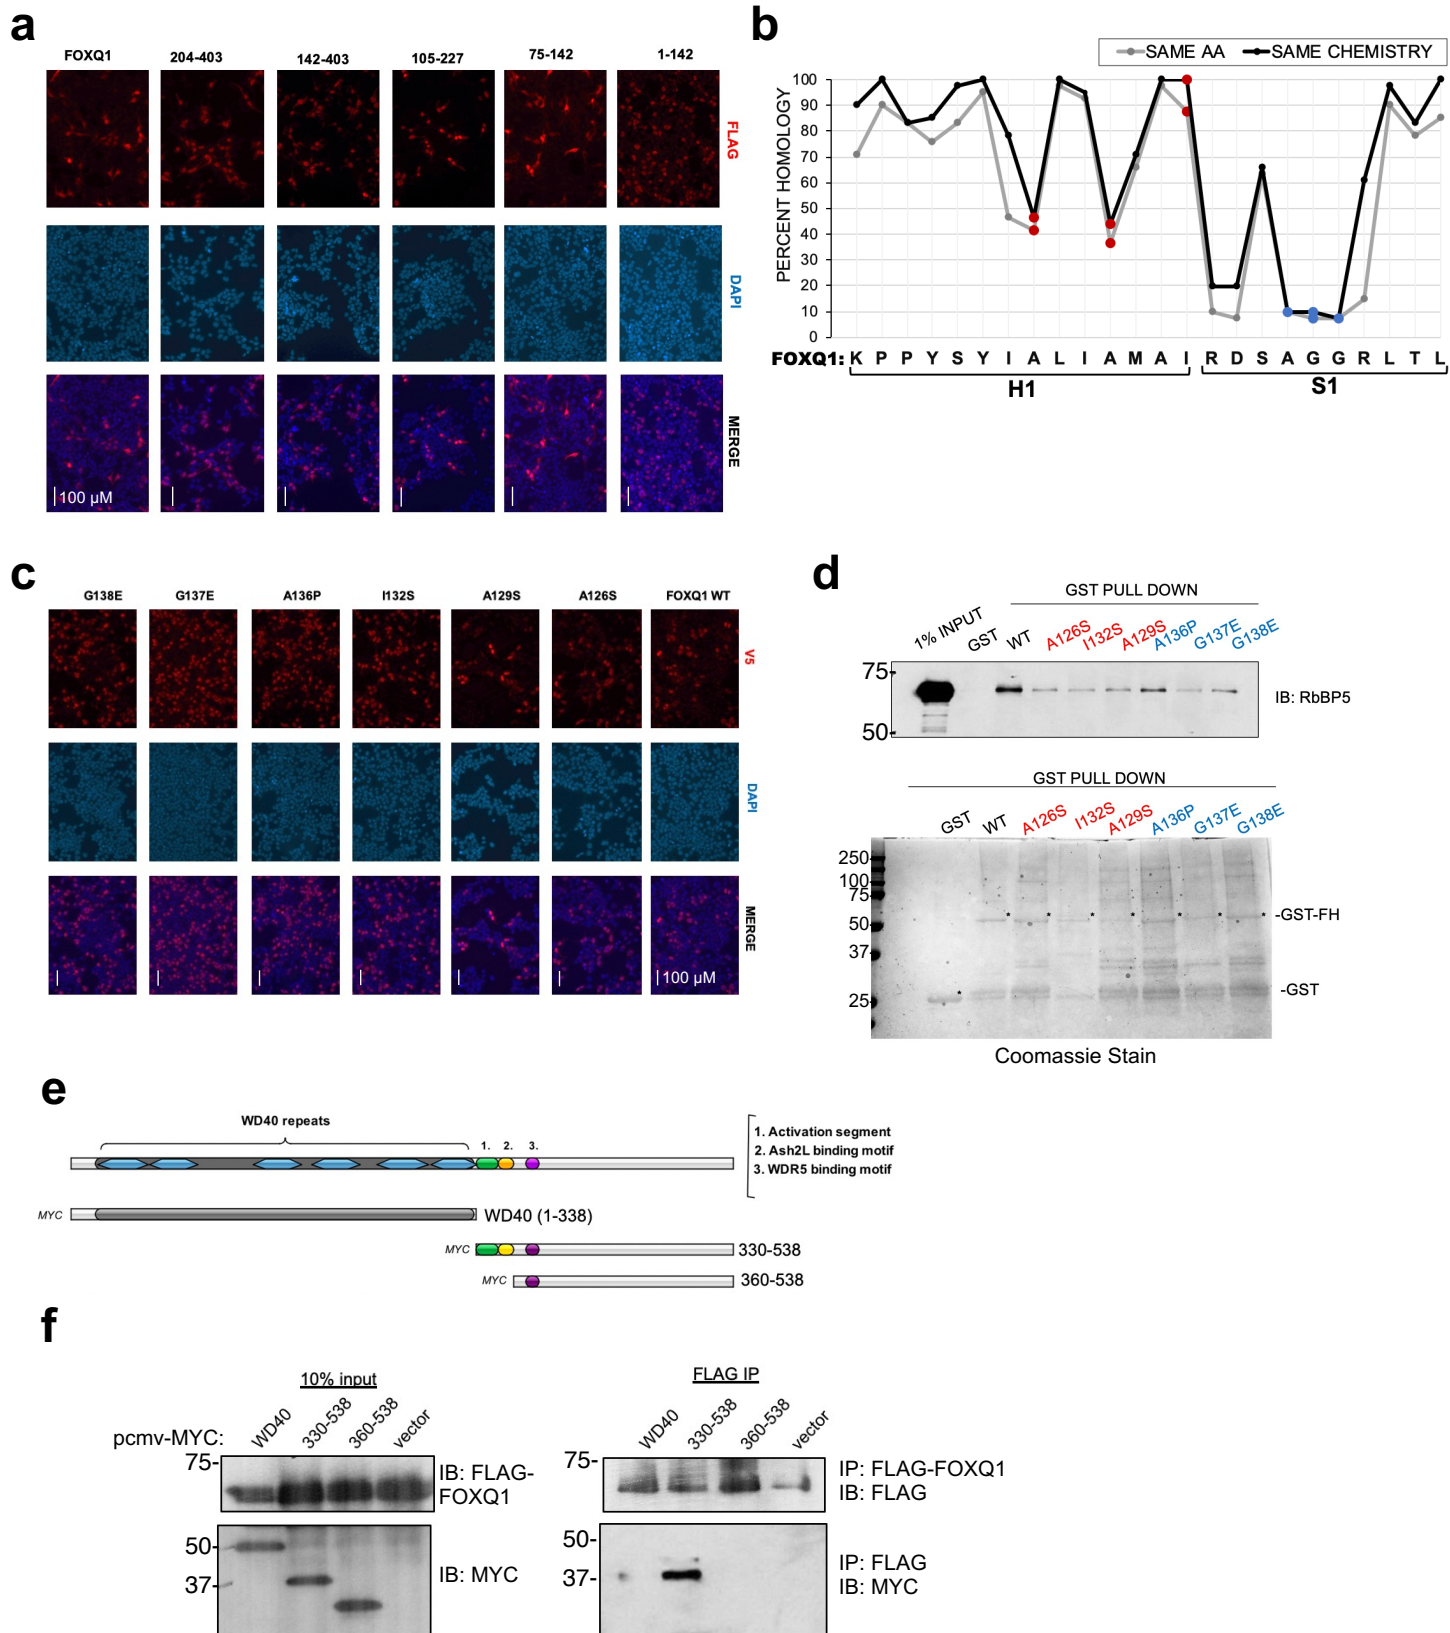

**Supplementary Figure 4: Extended validation of the FOXQ1 Forkhead box binding to RbBP5.** (a) Nuclear localization of all FLAG-tagged FOXQ1 fragments in HEK293 cells by immunofluorescent staining as indicated after 48 hours post transfection. Representative images (n=3). Scale bar: 100  $\mu$ M. (b) Homology analysis of FOXQ1 human H1-S1 FHD sequence relative to the H1-S1 FHD sequences of the 50 human FOX members. Red highlights residues in H1 and blue highlights residues within S1 that are critical for RbBP5 binding. (c) Nuclear localization of all V5-tagged wild-type and mutated FOXQ1 with point mutations in HEK293 cells by immunofluorescent staining as indicated after 48 hours post transfection. Representative images (n=3). Scale bar: 100  $\mu$ M. (d) GST-tagged FOXQ1-FH region (105-227), with either WT or point mutations, were purified and incubated at equimolar ratio with purified RbBP5 protein and analyzed by SDS-PAGE and western blot. GST pull-down was performed three times (n=3) and a representative result is shown. (e) Schematic of the RbBP5 functional domains subcloned into MYC-tag expression vector. The N-terminal contains a  $\beta$ -propeller domain consisting of WD40 repeats (1-338). The C-terminal of RbBP5 is unstructured and contains a central hinge region with motifs for: activating MLL (AS)(green), ASH2L binding (ABM)(yellow) and WDR5 binding (WBM)(purple). (f) Identification of the region of RbBP5 responsible for FOXQ1 binding by Co-IP. Full length FLAG-FOXQ1 was co-expressed with MYC-tagged RbBP5 fragments, individually, in HEK293T cells. Lysates were subject to FLAG-FOXQ1 IP and membranes were probed with MYC-antibody to detect RbBP5 fragments. Representative images are shown (n=3).

# Supplementary Figure 5

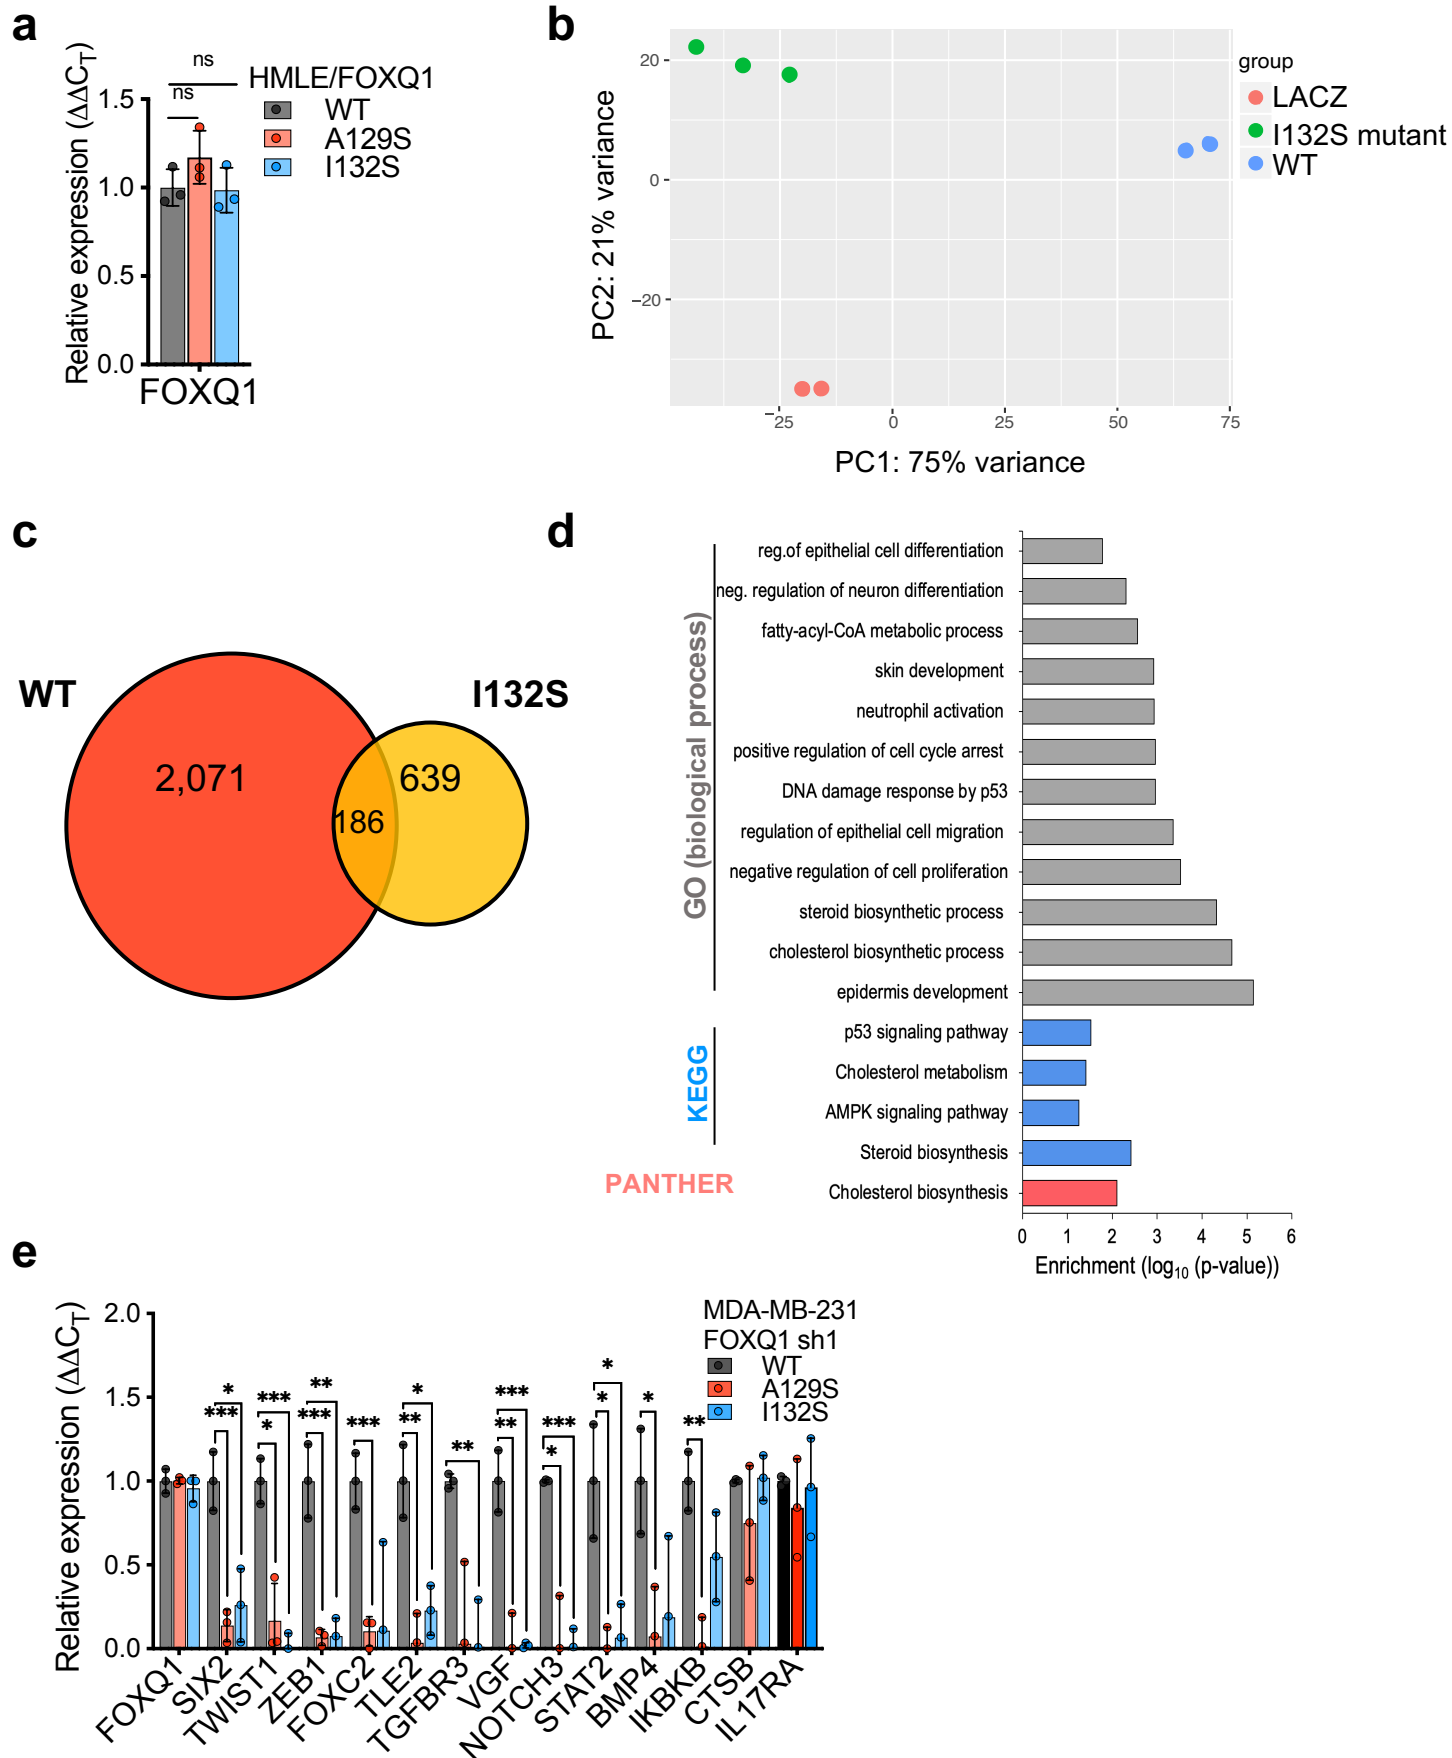

**Supplementary Figure 5: Disruption of RbBP5 recruitment prevents activation of the FOXQ1 EMT program.** **(a)** Stable lentiviral expression of FOXQ1-WT or FOXQ1 mutants (I132S, A129S) in HMLE cells was assessed by q-RT-PCR. q-RT-PCR data for FOXQ1 was normalized to  $\beta$ -actin in each sample and analyzed relative to the WT-FOXQ1 control cells. Bars indicate sample mean  $\pm$  SD. Dots mark the values obtained from three independent replicates normalized to WT control mean (n=3). Statistical significance was assessed by two-tailed t-test with Bonferroni correction: \* p<0.05, \*\* p<0.01, \*\*\* p<0.001. **(b)** Principal component analysis of the expression profiles of HMLE cells with stable FOXQ1-WT, FOXQ1-I132S or LacZ control. Each dot represents a single replicate from the RNA-seq data set (HMLE/FOXQ1-I132S n=3, HMLE/FOXQ1-WT n=2, HMLE/LacZ n=2). **(c)** Overlap of the differentially downregulated gene set in HMLE/FOXQ1-WT or HMLE/FOXQ1-I132S mutant cell line relative to HMLE/LacZ identified by RNA-seq. **(d)** Functional enrichment analysis of the genes upregulated in HMLE/FOXQ1 I132S mutant cells relative to HMLE/LacZ using Enrichr. Adjusted p-value was derived by comparing the gene set against the indicated annotation tools by Fisher's exact t-test with Benjamini-Hochberg method of correction for multiple hypotheses testing. Bar graph plots the  $\log_{10}$  adjusted p-value (Enrichment). **(e)** Expression of FOXQ1-regulated EMT target genes in MDA-MB-231 FOXQ1-sh1 cells with rescued expression of FOXQ1 mutants, A129S or I132S, or WT control. q-RT-PCR data for each gene was normalized to  $\beta$ -actin in each sample and analyzed relative to the WT-FOXQ1 cells. Bars indicate sample mean  $\pm$  SD. Dots mark the values obtained from three independent replicates normalized to the control mean (n=3). Statistical significance was assessed by unpaired, two-tailed t-test: \* p<0.05, \*\* p<0.01, \*\*\* p<0.001. For panels a and e, Source data are provided in Source Data 1.

# Supplementary Figure 6

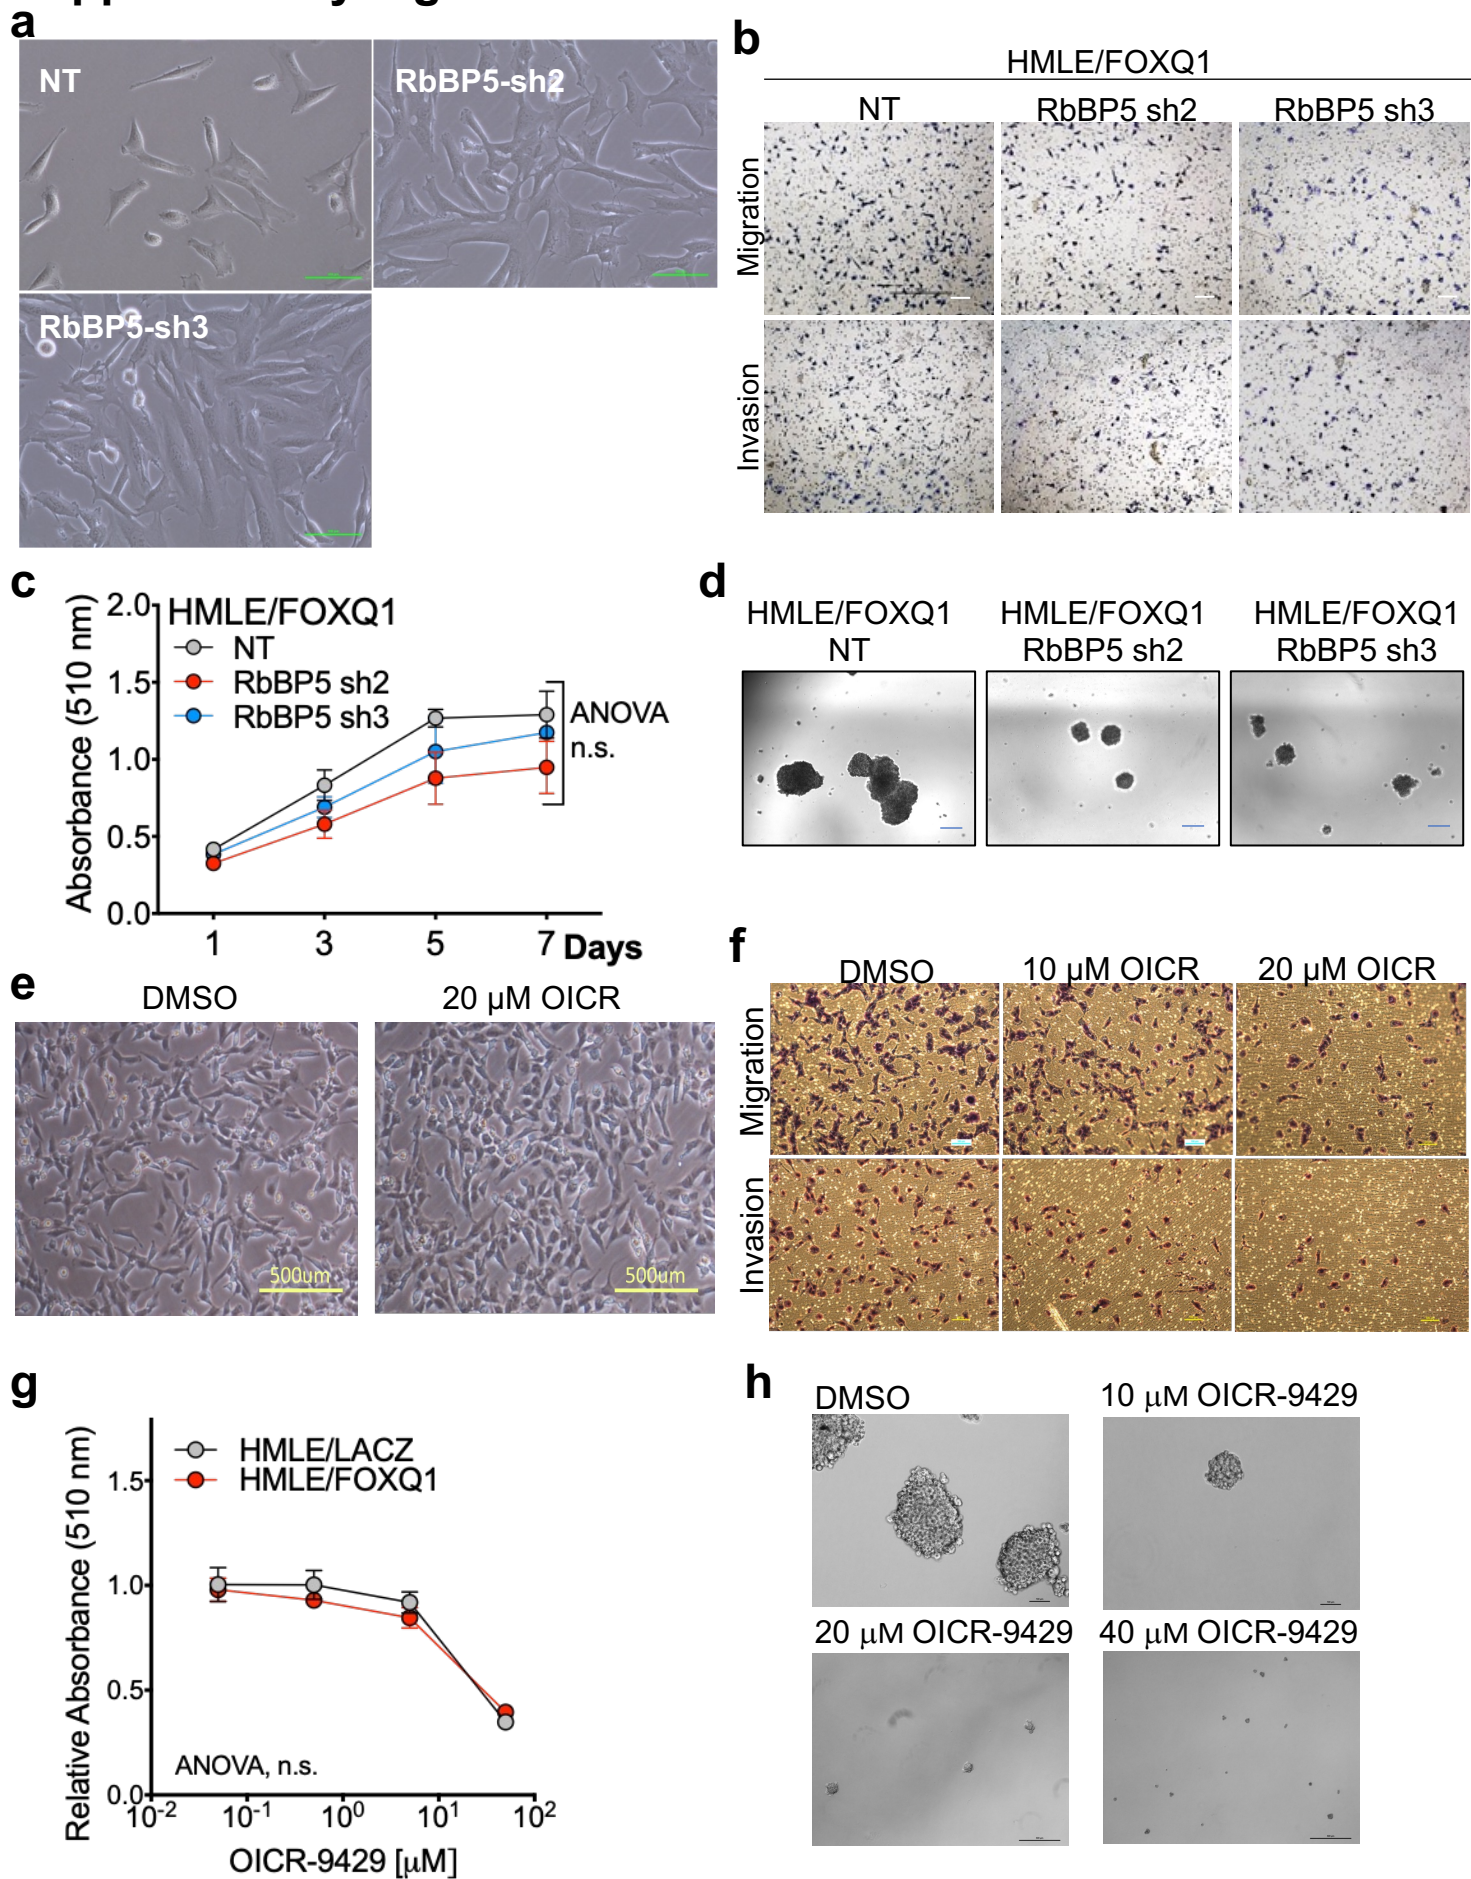

**i**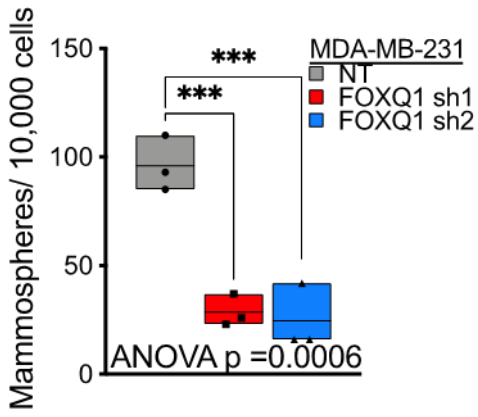**k**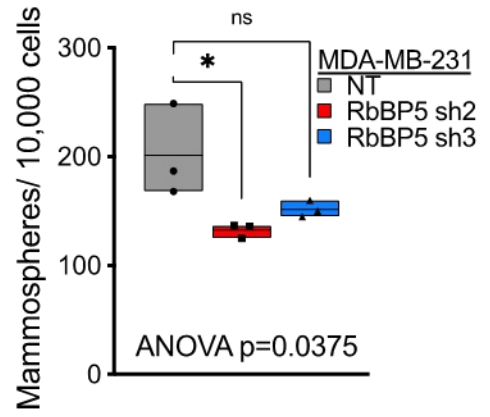**j**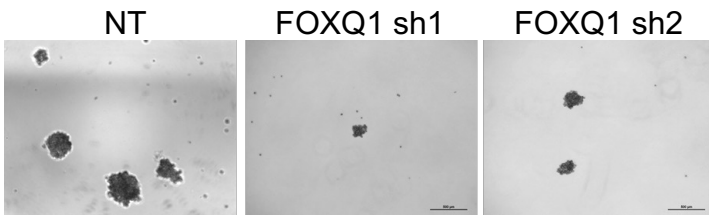**l**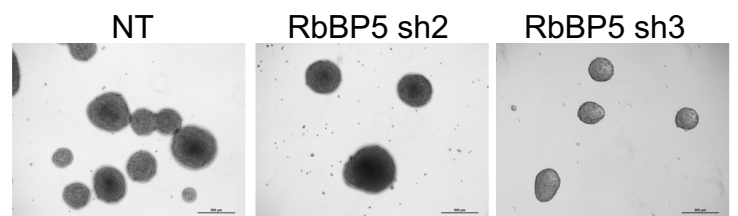

**Supplementary Figure 6: Targeting the MLL core complex decreases the FOXQ1-driven oncogenic phenotype *in vitro*.** (a) Representative pictures show morphologic change after knockdown of RbBP5 in HMLE/FOXQ1 cells. Scale bar: 100  $\mu\text{m}$ . Representative images (n=3). (b) Visualization of migration (top panels) and invasion (bottom panels) inserts of HMLE/FOXQ1 cells with shRbBP5 or NT control. Representative images are shown (n=3). Scale bar: 100  $\mu\text{m}$ . (c) Sulforhodamine B colorimetric (SBC) proliferation assay of HMLE/FOXQ1 shRbBP5 knockdown or NT control cells. Absorbance at 510nm, as a proxy for cell abundance, was measured at indicated time points. Mean absorbance  $\pm$  SD results are shown (n=6). Data were analyzed by repeated measures one-way ANOVA with Bonferroni correction. (d) Images of mammospheres formed by HMLE/FOXQ1 NT and shRbBP5 knockdown cells. Representative images are shown (n=3). Scale bar: 500  $\mu\text{m}$ . (e) Representative pictures show morphologic change after treatment of 20  $\mu\text{M}$  OICR -9429 in HMLE/FOXQ1 cells 72 hours post treatment. Representative images are shown (n=3). Scale bar: 500  $\mu\text{m}$ . (f) Visualization of migration (top panels) and invasion (bottom panels) inserts from HMLE/FOXQ1 cells treated with 10 and 20  $\mu\text{M}$  OICR-9429 or DMSO control. Representative images are shown (n=3). Scale bar: 100  $\mu\text{m}$ . (g) Effects of OICR-9429 treatment on cell proliferation analyzed by SBC assay. Absorbance at 510nm was measured at indicated time points and normalized to the DMSO mock treatment group for each cell line. Mean absorbance  $\pm$  SD results are shown (n=6). Data were analyzed by two-way ANOVA with Bonferroni correction for multiple comparisons. (h) Images of mammospheres formed by HMLE/FOXQ1 cells pretreated with indicated doses of OICR-9429 for 72 hours prior to plating. Representative images are shown (n=3). Scale bar: 500  $\mu\text{m}$ . (i-j) Quantification (i) and visualization (j) of mammospheres formed by MDA-MB-231 cells with stable FOXQ1 shRNA knockdown or NT control. Scale bar: 500  $\mu\text{m}$ . (k-l) Quantification (k) and visualization (l) of mammospheres formed by MDA-MB-231 with stable RbBP5 shRNA knockdown or NT control. Scale bar: 500  $\mu\text{m}$ . For panels i-l: Mammospheres  $\geq$  50  $\mu\text{m}$  in diameter were quantified. Floating bars mark the sample mean, minimum and maximum values. Data were normalized to the mean of the control group. Dots mark the individual values from three individual replicates (n=3). Groups were compared by one way ANOVA with Bonferroni correction for multiple comparisons. \*  $p < 0.05$ , \*\*  $p < 0.01$ , \*\*\*  $p < 0.001$ .



# Supplementary Figure 7

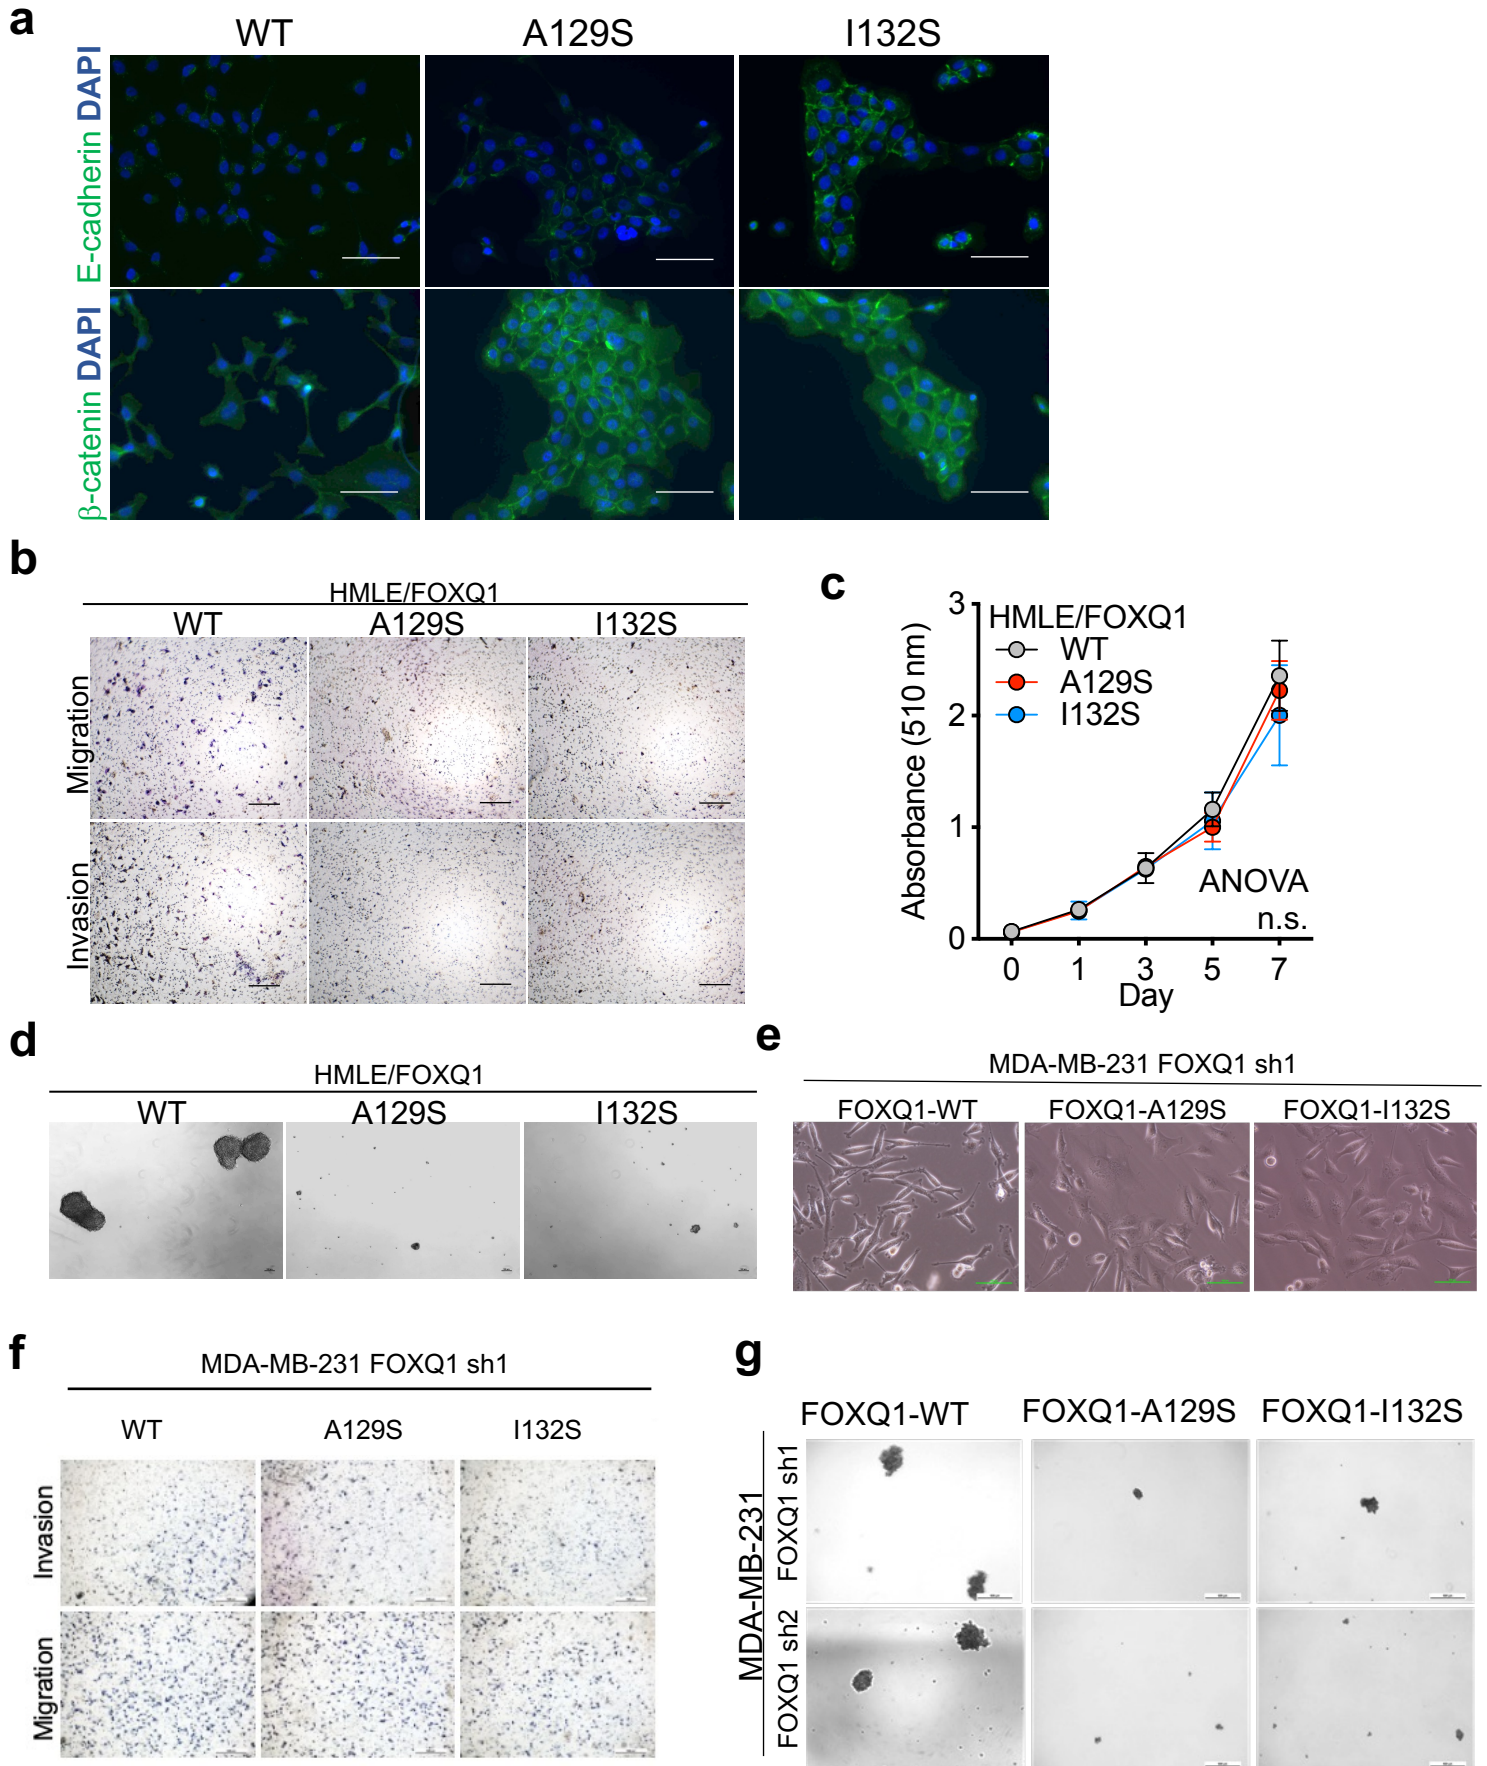

**Supplementary Figure 7: Expression of FOXQ1 RbBP5-defective mutants results in a decrease in FOXQ1-driven oncogenic potential *in vitro*.** (a) Immunofluorescence staining of E-cadherin (top panels) and  $\beta$ -catenin (bottom panels) localization in HMLE/FOXQ1-WT, HMLE/FOXQ1-A129S, and HMLE/FOXQ1-I132S cells. Representative images (n=3). Scale bar: 100  $\mu$ M. (b) Visualization of cells migrated (top panels) and invaded (bottom panels) in WT and mutant FOXQ1 HMLE cell models. Representative field images are shown (n=3). Scale bar: 100  $\mu$ m. (c) Cell proliferation of HMLE cells with WT, A129S or I132S FOXQ1 expression measured by SBC assay. Absorbance at 510 nm measured at indicated time points. Mean absorbance  $\pm$  SD shown from 6 independent replicates (n=6). Data were analyzed by repeated measures one-way ANOVA with Bonferroni correction. (d) Visualization of the mammosphere formation capability of HMLE/FOXQ1-WT, HMLE/FOXQ1-A129S, and HMLE/FOXQ1-I132S cells. Representative field images are shown (n=3). Scale bar: 100  $\mu$ m. (e) Morphology of MDA-MB-231shFOXQ1 cells expressing either WT, A129S, or I132S FOXQ1. Representative images are shown (n=3). Scale bar: 100  $\mu$ m. (f) Visualization of migration (top panels) and invasion (bottom panels) inserts from MDA-MB-231shFOXQ1 cells expressing either WT, A129S, or I132S FOXQ1. Representative field images are shown (n=3). Scale bar: 100  $\mu$ m. (g) Visualization of the mammosphere formation capability of MDA-MB-231shFOXQ1 cells expressing either WT or mutant (A129S, I132S) FOXQ1. Representative field images are shown (n=3). Scale bar: 500  $\mu$ m. For panels c, g, i and k, source data are provided in Source Data file 1.

# Supplementary Figure 8

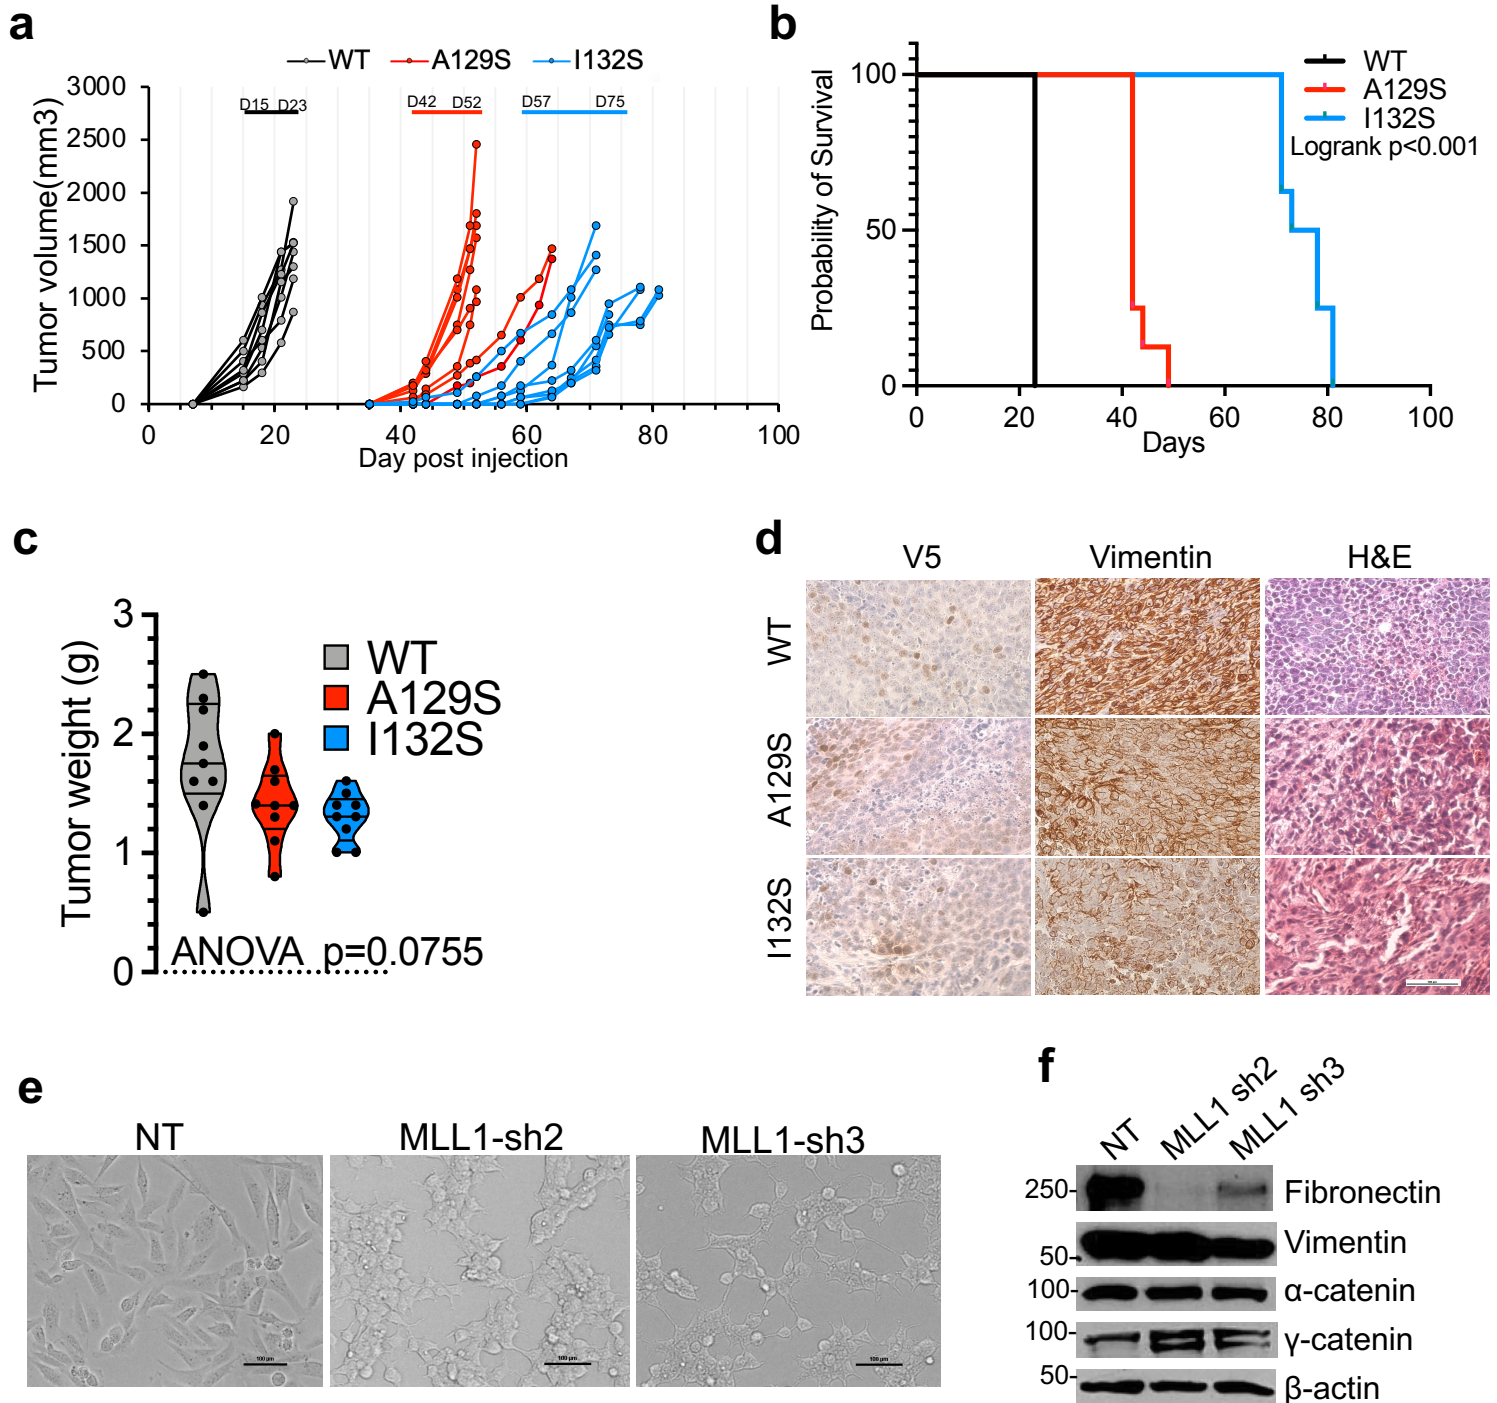

**Supplementary Figure 8: Disruption of the FOXQ1-RbBP5 interaction results in an inhibition of tumor progression *in vivo*.** (a) Results of tumor formation and growth of HMLER/FOXQ1-WT, HMLER/FOXQ1-A129S, and HMLER/FOXQ1-I132S cells engrafted orthotopically into mammary fat pads of NSG mice. Mice were sacrificed when tumor reached approximately 1500 mm<sup>3</sup> with n=8 mice per group. Tumor volume was measured approximately every three days by caliber. The median tumor onset and median endpoint are also marked for each group as timeline above the line graph. (b) Kaplan Meyer plot of the time to euthanasia of NSG mice engrafted with HMLER cells expressing either FOXQ1-WT, FOXQ1-A129S, or FOXQ1-I132S (n=8 mice per group). Survival analysis of the time to euthanasia for NSG mice engrafted with HMLER cells expressing either FOXQ1-WT, FOXQ1-A129S, or FOXQ1-I132S (n=8 mice per group) by log rank test. (c) Summary of the final tumor weights for the primary tumors formed from the engraftment of HMLER cells with indicated FOXQ1 expression (n=8 mice per group). Data were analyzed by one-way ANOVA with Bonferroni correction for multiple comparisons. (d) IHC staining of the primary tumors formed from the engraftment of HMLER cells. expressing either WT-, A129S-, or I132S- FOXQ1, for vimentin expression and V5-antibody detection of tagged FOXQ1 protein. The image is representative of IHC staining from each of the primary tumors (n=5 per tumor). Scale bar:100 μm. (e) Representative images of cell morphology for MDA-MB231 cells with and without MLL1 knockdown. Representative images (n=3). Scale bar:100 μm. (f) Western blotting analysis of EMT markers in MDA-MB231 cells with MLL1 knockdown and non-target cells. Representative images (n=3). For panels a, b and c, source data are provided in Source Data file 1.

## Supplementary Table 1: Sequences of gene-specific shRNAs

| shRNA     | Clone ID       | Targeting sequence (5'→3') |
|-----------|----------------|----------------------------|
| RbBP5 sh2 | TRCN0000034413 | GCCTTCTGTAGCAGTGATGAA      |
| RbBP5 sh3 | TRCN0000034410 | GCTCTATTGTATTTACCCATT      |
| FOXQ1 sh1 | V3LHS_381794   | GAGCATCCAGTAGTTGTCC        |
| FOXQ1 sh2 | V3LHS_381789   | TGGGGTTGAGCATCCAGTA        |
| MLL1 sh2  | TRCN0000005955 | ATACTTCTGTTCTGGATGGG       |
| MLL1 sh3  | TRCN0000005956 | AAATGAGAGCTGCTTTAGGCG      |

Note: pLKO.1 vector expressing scramble shRNA (designated as NT) was used to match RbBP5 and MLL1 shRNA. pGipZ vector expressing scramble shRNA (designated as NT) was used to match FOXQ1 shRNA.

## Supplementary Table 2: PCR primers, Cloning primers and mutagenesis primers

### Quantitative reverse-transcriptase PCR primers

| Gene    | Forward Primer (5'→3')   | Reverse Primer (5'→3')   |
|---------|--------------------------|--------------------------|
| FOXQ1   | AACGACTGCTTCGTCAAGGT     | GCATCCAGTAGTTGTCTTGC     |
| RbBP5   | CCAAGAAGAAGCAAGCAGGC     | ATTGCTCCTCCTGCTGTCAA     |
| SIX2    | GCCTGCGAGCACCTCCACAAGAAT | CACCGACTTGCCACTGCCATTGAG |
| TWIST1  | TCGGTCTGGAGGATGGAGGGG    | AATGACATCTAGGTCTCCGGCCC  |
| ZEB1    | TGACCTGCCAACAGACCAGACA   | CCTTTCCTGTGTCATCCTCCCAGC |
| FOXC2   | GCTCGCTCAGGTAGGGCACC     | CGAGCCGTCTCGGAAGCAGC     |
| TLE2    | CTGTCCCCTGAAGTTTGCCTC    | GGACTGAGGACGACTCCTTG     |
| TGFBR3  | GATGGCGTAGTTTTGCCGC      | GCAATTTTCAAACCTGCCTCGGA  |
| VEGF    | TCAGTCCAAGTAGCGCCAAG     | GGCTCTCCAGATCACTCGG      |
| NOTCH3  | GAGCCAATGCCAACTGAAGAG    | GGCAGATCAGGTCCGAGATG     |
| STAT2   | GGTGTGGAAGCTTGGTGTGA     | AGGAGGAGAACTGCCAACTG     |
| BMP4    | CACCTCATCACACGACTACT     | TCCAGTATCCCCAAAGCCTGT    |
| BMP4?   | CGTCCAAGCTATCTCGAGCC     | CGGAATGGCTCCATAGGTCC     |
| IKBKB   | GATTGCCATCAAGCAGTGCC     | GGGTGGTTCAGCCTTCTCAT     |
| CTSB    | CTCCTGCTGGCTGTAATGGT     | GGATGGAGTACGGTCTGCAC     |
| IL17RA  | AGAACCAATTCCGGGGCCT      | GGTCGGCTGAGTAGATGATCC    |
| HOXB7   | CCCTTTGAGCAGAACCTCTCC    | CGGTCAGTTCTGAGCTTCG      |
| β-ACTIN | CAGAAGGAGATCACTGCCC      | CATCTGCTGGAAGGTGGAC      |

### Quantitative ChIP PCR primers

| Promoter | Forward Primer (5'→3')      | Reverse Primer (5'→3')      | Amplicon chromosomal location (hg19) |
|----------|-----------------------------|-----------------------------|--------------------------------------|
| SIX2     | ACTCGGAGAGGAGAAGA<br>AACT   | GCTTTCTCGGGCTATGC<br>ACT    | chr2: 45255184-45255278              |
| TWIST1   | CTGCAGACTTGGAGGCT<br>CTT    | CTCACGTCAGGCCAATG<br>ACA    | chr10: 31598478 -31598586            |
| ZEB1     | ACTGTCCCATTGTCCTT<br>CATA   | AGCATTGTCTGATGGGA<br>AGTACA | chr7: 19157269-19157344              |
| FOXC2    | CTACAGCTACATCGCGC<br>TCA    | TCTCCCCGGTAGAAGGG<br>GAAG   | chr16: 86601169-86601275             |
| TLE2     | GCTATTACTACTGGGCTA<br>CCTGG | GGCAAGCTCTCAGCCCC<br>ATAA   | chr19: 3041332-3041407               |
| TGFBR3   | TGGATGCTTCAAACAGG<br>CTCT   | GGACAGGAGAACTCAT<br>TCCT    | chr1: 92115428-92115518              |
| VEGF     | TCTCCCCACCCCAAAT<br>TC      | ATCCAATGGGATCAGTTT<br>GCC   | chr7:100825337-100825441             |
| NOTCH3   | TGACACAGGCGTCATCC<br>AG     | CAAGGGGTGTGGGCCTT<br>TT     | chr19:15300207-15300306              |
| STAT2    | GGAGTCCCTTGGAAAGT<br>TTGGT  | CACTAGCCACTTCCCCT<br>CATC   | chr12: 56734932-56735013             |
| BMP4     | ACCAGGAACTTGGTGT<br>CCA     | TGTGGGTCTCAGTCTCAT<br>CTG   | chr14: 54433720-54433803             |
| IKBKB    | AGCTCCAGGTTGTACAG<br>AAAACA | TCACCTGATGGCAGTGA<br>AGC    | chr8: 42123850-42123928              |
| CTSB     | TGCTCATTAGTGTCTGC<br>CTCT   | TAATCTCGCCTGCGGTT<br>GAA    | chr8: 11719310-11719380              |
| IL17RA   | GGGCAGAGGCCTTCTC<br>ATTC    | TCTGAGCTCCTAGCTCTT<br>AGGG  | chr22: 17564162-17564230             |
| HOXB7    | GTTCCCAGGGTACTGA<br>GTG     | CTTTGATTTGGAGGGGC<br>CGA    | chr17: 46678594-46678686             |

### FOXQ1 site directed mutagenesis primers (pENTR)

| Mutation | Forward Primer (5'→3')                   | Reverse Primer (5'→3')                 |
|----------|------------------------------------------|----------------------------------------|
| K112E    | AGGGTGCACGCAGCGAGCCATATACGC              | GCGTATATGGCTCGCTGCGTGCACCCT            |
| A126S    | CCCTACTCGTACATCAGCCTCATCGCCATGGCCATCCG   | CGGATGGCCATGGCGATGAGGCTGATGTACGAGTAGGG |
| I128S    | TCATCGCCATGGCCAGCCGCGACTCGGC             | GCCGAGTCGCGGCTGGCCATGGCGATGA           |
| A129S    | TCGTACATCGCGCTCATCTCCATGGCCATCCGC        | GCGGATGGCCATGGAGATGAGCGCGATGTACGA      |
| A136P    | ATCCGCGACTCGCCGGGCGGGCGCTTGACG           | CGTCAAGCGCCCCGCCGAGTCGCGGAT            |
| G137E    | ATCCGCGACTCGGCGGAAGGGCGCTTGACGCTGGCG     | CGCCAGCGTCAAGCGCCCTTCGCGGAGTCGCGGAT    |
| G138E    | CGACTCGGCGGGCAAGCGCTTGACGCTGGCGGA        | TCCGCCAGCGTCAAGCGCTTGCCCGCCGAGTCG      |
| R164E    | CAGCTACACGGGCTGGGAAAACCTCCGTGCGCCACAACC  | GTTGTGGCGCACGGAGTTTTCCAGCCCGTGTAGCTG   |
| R168E    | GGCTGGCGCAACTCCGTGGAACACAACCTTTCGCTCAACG | CGTTGAGCGAAAGTTGTGTTCCACGGAGTTGCGCCAGC |

### Cloning Primers

#### FOXQ1 fragment cloning (pcmv7.1-3xFLAG)

| Region (AA position) | Forward Primer (5'→3')                 | Reverse Primer (5'→3')                 |
|----------------------|----------------------------------------|----------------------------------------|
| 1-142                | AGGGTGCACGCAGCGAGCCATATACGC            | GCGTATATGGCTCGCTGCGTGCACCCT            |
| 105-227              | CCCTACTCGTACATCAGCCTCATCGCCATGGCCATCCG | CGGATGGCCATGGCGATGAGGCTGATGTACGAGTAGGG |
| 205-403              | TCATCGCCATGGCCAGCCGCGACTCGGC           | GCCGAGTCGCGGCTGGCCATGGCGATGA           |
| 143-403              | TCGTACATCGCGCTCATCTCCATGGCCATCCGC      | GCCGAGTCGCGGCTGGCCATGGCGATGA           |
| 75-142               | ATCCGCGACTCGCCGGGCGGGCGCTTGACG         | GCGTATATGGCTCGCTGCGTGCACCCT            |

#### FOXQ1 GST cloning (pGEx-6p2)

| FOXQ1       | Forward Primer (5'→3')                 | Reverse Primer (5'→3')                 |
|-------------|----------------------------------------|----------------------------------------|
| Full Length | GAAGCGGATCCATGAAGTTGGAGGTGTTTCGT       | CCTCGACTCGAGTCAGGCTAGGAGCGTCTCC        |
| 105-227     | CCCTACTCGTACATCAGCCTCATCGCCATGGCCATCCG | CGGATGGCCATGGCGATGAGGCTGATGTACGAGTAGGG |

#### RbBP5 fragment cloning (pcmv-MYC)

| Region (AA position) | Forward Primer (5'→3')                      | Reverse Primer (5'→3')                         |
|----------------------|---------------------------------------------|------------------------------------------------|
| 1-338                | TGGCCATGGAGGCCCGAATTCGGATGAACCTCGAGTTGCTGG  | GGATCCCCCGGGCCGCGGTACCTCATTCTTTGAAGTCTGTGCAAAT |
| 330-538              | TGGCCATGGAGGCCCGAATTCGGAGTGCATTTGCACCA GACT | GGATCCCCCGGGCCGCGGTACCTCATAACAGTTCTGA GATTGCT  |
| 360-538              | TGGCCATGGAGGCCCGAATTCGGAGTGCAGCTGAGCAG ACAG | GGATCCCCCGGGCCGCGGTACCTCATAACAGTTCTGA GATTGCT  |

### Supplementary Table 3: Antibodies

| Antibody                                               | Species | Clone           | Lot. No   | Supplier                                   | Catalog No.  | WB      | IF    | FACs  | IP    |
|--------------------------------------------------------|---------|-----------------|-----------|--------------------------------------------|--------------|---------|-------|-------|-------|
| anti-RbBP5                                             | Rabbit  |                 | 3         | Bethyl                                     | A300-109A    | 1:1000  |       |       | 1:200 |
| anti-V5                                                | Mouse   |                 | 2212258   | invitrogen                                 | 46-0705      | 1:1000  | 1:800 |       | 1:200 |
| Anti-H3K4me3: ChIPAb+ Trimethyl-Histone H3 (Lys4)      | Rabbit  |                 | 2871690   | EMD Millipore                              | 17-614       |         |       |       | 1:100 |
| Anti-FOXQ1 antigen: KLEVFVPRAAHGD KQGS DLEGAGGSD APSPL | Rabbit  |                 |           | Dr. Shengping Zhang and Dr. Chuanguai Wang | N/A          | 1:3000  |       |       |       |
| anti-ASH2L                                             | mouse   |                 | H3117     | Santa Cruz Biotechnology                   | sc-81184     | 1:1000  |       |       |       |
| anti-WDR5                                              | Rabbit  |                 | 1         | Bethyl                                     | A302-430A    | 1:1000  |       |       |       |
| anti-β-actin (C4)                                      | Mouse   | C4              | E0720     | Santa Cruz Biotechnology                   | sc-47778     | 1:2000  |       |       |       |
| anti-N-Cadherin                                        | mouse   | 32/N-cadherin   | 9322775   | BD Transduction Labs                       | 610920       | 1:2000  |       |       |       |
| anti-Vimentin                                          | Rabbit  |                 | 8         | Cell Signaling Technology                  | 5741S        | 1:1000  |       |       |       |
| anti-Fibronectin                                       | Mouse   | 10/Fibronectin  | 9070804   | BD Transduction Labs                       | 610077       | 1:5000  |       |       |       |
| anti-Claudin-1 (D-4)                                   | mouse   | D-4             | D1218VL   | Santa Cruz Biotechnology                   | sc-137121    | 1:500   |       |       |       |
| Anti-Occludin                                          | mouse   | E5              | JO118     | Santa Cruz Biotechnology                   | sc-133256    | 1:500   |       |       |       |
| anti-FLAG                                              | mouse   |                 | SLBT7654  | Sigma Aldrich                              | F1804 0.2 MG |         | 1:800 |       |       |
| Anti-Myc                                               | Rabbit  |                 | 5         | Cell Signaling Technology                  | 2278S        | 1;1000  | 1:400 |       |       |
| anti-HA                                                | Mouse   | 2-2.2.14        | RJ241582  | invitrogen                                 | 26183        | 1:5,000 |       |       |       |
| anti-E-cadherin                                        | mouse   | 36/E-cadherin   | 1033217   | BD Transduction Labs                       | 610405       | 1:2000  |       |       |       |
| anti-α-catenin                                         | mouse   | 5/a-catenin     | 31292     | BD Transduction Labs                       | 610193       | 1:500   |       |       |       |
| anti-β-catenin                                         | mouse   | 14/Beta-catenin | 20079     | BD Transduction Labs                       | 610153       | 1:1000  |       |       |       |
| anti-γ-catenin                                         | mouse   | 15/γ-Catenin    | 15770     | BD Transduction Labs                       | 610253       | 1:2000  |       |       |       |
| Anti-KMT2A/MLL1                                        | Rabbit  |                 | 5         | Bethyl Laboratory                          | A300-374A    | 1:2000  |       |       |       |
| Anti-KMT2B/MLL2                                        | Rabbit  |                 | VL3148318 | Invitrogen                                 | PA5-103371   | 1:1000  |       |       |       |
| Anti-KMT2C/MLL3                                        | Rabbit  |                 | 129K0565  | SIGMA-ALDRICH                              | SAB1300082   | 1:1000  |       |       |       |
| Anti-KMT2D/MLL4                                        | Rabbit  |                 | 3487515   | EMD millipore                              | ABE1867      | 1:500   |       |       |       |
| Anti-KMT2E/SET1A                                       | Rabbit  |                 | 7         | Bethyl laboratory                          | A300-289A-M  | 1:1000  |       |       |       |
| Anti-KMT2F/SET1B                                       | Rabbit  |                 | 1         | Bethyl laboratory                          | A302-280A    | 1:500   |       |       |       |
| Horse Anti-Mouse IgG Antibody (H+L), Peroxidase        | Mouse   |                 | ZG1208    | Vector Laboratories                        | PI-2000-1    | 1:3000  |       |       |       |
| anti-Rabbit IgG horse radish peroxidase linked         | Rabbit  |                 | 27        | Cell Signaling Technology                  | 7074         | 1:3000  |       |       |       |
| PE anti-Human CD24                                     | Mouse   | ML5             | 5049759   | BD Pharmingen                              | 555428       |         |       | 1:100 |       |
| FITC anti-Human CD44                                   | Mouse   | G44-26          | 5275777   | Pharmingen                                 | 555478       |         |       | 1:100 |       |
| Alexa Fluor 488 goat anti-mouse IgG                    | Mouse   |                 | 481679    | invitrogen                                 | A11001       |         | 1:800 |       |       |
| Alexa Fluor 594 goat anti-mouse IgG                    | Mouse   |                 | 610868    | invitrogen                                 | A11005       |         | 1:800 |       |       |
